# Supplementary material for: Genomic Dissection of Local Adaptation in Elymus sibiricus: Integrating SLAF Sequencing, Genetic Diversity, Genotype-Environment Association, and Common Garden Experiments
Source: Research Square preprint supplement (doi:10.21203/rs.3.rs-8447544/v1), 2026-01-28
Supplement: Supplementary file 1 [file 3008669415e5b5aba5cf2d9a.xlsx]

## Sheet: Sheet1
#GeneID	COG_class	COG_class_annotation	GO_annotation	KEGG_annotation	KEGG_pathway	KOG_class	KOG_class_annotation	Pfam_annotation	Swissprot_annotation	eggNOG_class	eggNOG_class_annotation	nr_annotation
EsiH02g0031450	--	--	Molecular Function: binding (GO:0005488);; Cellular Component: nucleus (GO:0005634);;	--	--	--	--	Helix-loop-helix DNA-binding domain	Transcription factor bHLH35 OS=Arabidopsis thaliana OX=3702 GN=BHLH35 PE=2 SV=1	K	Transcription	bHLH27 [Triticum aestivum]
EsiH02g0027460	[O]	Posttranslational modification, protein turnover, chaperones	Molecular Function: ATP binding (GO:0005524);; Cellular Component: mitochondrial matrix (GO:0005759);; Biological Process: response to unfolded protein (GO:0006986);; Cellular Component: chloroplast (GO:0009507);; Molecular Function: transition metal ion binding (GO:0046914);; Molecular Function: unfolded protein binding (GO:0051082);; Biological Process: chaperone mediated protein folding requir…	K04078|5.78924e-119|bdi:100821312|K04078 chaperonin GroES | (RefSeq) 20 kDa chaperonin, chloroplastic-like	--	[O]	Posttranslational modification, protein turnover, chaperones	Chaperonin 10 Kd subunit	20 kDa chaperonin, chloroplastic OS=Arabidopsis thaliana OX=3702 GN=CPN20 PE=1 SV=2	O	Posttranslational modification, protein turnover, chaperones	20 kDa chaperonin, chloroplastic-like [Aegilops tauschii subsp. tauschii]
EsiH02g0015730	--	--	Cellular Component: mitochondrion (GO:0005739);; Molecular Function: acetylglucosaminyltransferase activity (GO:0008375);; Cellular Component: integral component of membrane (GO:0016021);;	--	--	--	--	Core-2/I-Branching enzyme	--	S	Function unknown	uncharacterized protein LOC109781358 isoform X2 [Aegilops tauschii subsp. tauschii]
EsiH02g0014650	--	--	Biological Process: regulation of cyclin-dependent protein serine/threonine kinase activity (GO:0000079);; Molecular Function: protein kinase binding (GO:0019901);;	--	--	[R]	General function prediction only	Cyclin;; Cyclin, N-terminal domain	Cyclin-P1-1 OS=Oryza sativa subsp. japonica OX=39947 GN=CYCP1-1 PE=3 SV=2	S	Function unknown	cyclin-P1-1 [Aegilops tauschii subsp. tauschii]
EsiH02g0043830	[J]	Translation, ribosomal structure and biogenesis	Biological Process: translational termination (GO:0006415);; Cellular Component: chloroplast (GO:0009507);; Biological Process: chloroplast organization (GO:0009658);; Biological Process: thylakoid membrane organization (GO:0010027);; Molecular Function: translation release factor activity, codon specific (GO:0016149);; Biological Process: plastid translation (GO:0032544);; Molecular Function: ri…	K02835|0|bdi:100835769|K02835 peptide chain release factor 1 | (RefSeq) peptide chain release factor APG3, chloroplastic	--	[J]	Translation, ribosomal structure and biogenesis	PCRF domain;; RF-1 domain	Peptide chain release factor APG3, chloroplastic OS=Arabidopsis thaliana OX=3702 GN=APG3 PE=2 SV=1	J	Translation, ribosomal structure and biogenesis	peptide chain release factor APG3, chloroplastic isoform X1 [Aegilops tauschii subsp. tauschii]
EsiH03g0037600	[T]	Signal transduction mechanisms	Molecular Function: protein serine/threonine kinase activity (GO:0004674);; Molecular Function: ATP binding (GO:0005524);; Cellular Component: nucleus (GO:0005634);; Cellular Component: cytoplasm (GO:0005737);; Biological Process: endocytosis (GO:0006897);; Biological Process: regulation of cell shape (GO:0008360);; Biological Process: Wnt signaling pathway (GO:0016055);; Biological Process: pept…	K08959|0|bdi:100838167|K08959 casein kinase 1, delta [EC:2.7.11.1] | (RefSeq) casein kinase I-like	--	[T]	Signal transduction mechanisms	Protein kinase domain;; Protein tyrosine kinase	Casein kinase 1-like protein 3 OS=Arabidopsis thaliana OX=3702 GN=CKL3 PE=1 SV=1	T	Signal transduction mechanisms	predicted protein [Hordeum vulgare subsp. vulgare]
EsiH03g0029120	[R]	General function prediction only	Biological Process: phosphorelay signal transduction system (GO:0000160);; Molecular Function: DNA binding (GO:0003677);; Molecular Function: GTP binding (GO:0005525);; Cellular Component: intracellular (GO:0005622);; Biological Process: regulation of transcription, DNA-templated (GO:0006355);; Biological Process: intracellular protein transport (GO:0006886);; Biological Process: small GTPase med…	K07976|4.21398e-142|bdi:100826758|K07976 Rab family, other | (RefSeq) ras-related protein RABA1f	--	[U]	Intracellular trafficking, secretion, and vesicular transport	Ras family;; Ras of Complex, Roc, domain of DAPkinase;; ADP-ribosylation factor family;; 50S ribosome-binding GTPase;; Gtr1/RagA G protein conserved region	Ras-related protein RABA1f OS=Arabidopsis thaliana OX=3702 GN=RABA1F PE=2 SV=1	S	Function unknown	ras-related protein RABA1f-like isoform X2 [Aegilops tauschii subsp. tauschii]
EsiH03g0028290	[V]	Defense mechanisms	Biological Process: drug transmembrane transport (GO:0006855);; Molecular Function: drug transmembrane transporter activity (GO:0015238);; Molecular Function: antiporter activity (GO:0015297);; Cellular Component: integral component of membrane (GO:0016021);;	K03327|0|bdi:100842855|K03327 multidrug resistance protein, MATE family | (RefSeq) protein DETOXIFICATION 12-like	--	[R]	General function prediction only	MatE	Protein DETOXIFICATION 14 OS=Arabidopsis thaliana OX=3702 GN=DTX14 PE=1 SV=1	V	Defense mechanisms	protein DETOXIFICATION 12-like [Aegilops tauschii subsp. tauschii]
EsiH03g0028240	[L]	Replication, recombination and repair	Molecular Function: DNA binding (GO:0003677);; Molecular Function: DNA ligase (ATP) activity (GO:0003910);; Molecular Function: ATP binding (GO:0005524);; Biological Process: DNA replication (GO:0006260);; Biological Process: DNA recombination (GO:0006310);; Cellular Component: plastid (GO:0009536);; Biological Process: DNA ligation involved in DNA repair (GO:0051103);; Biological Process: DNA bi…	--	--	[L]	Replication, recombination and repair	ATP dependent DNA ligase domain;; DNA ligase N terminus;; DNA repair metallo-beta-lactamase;; UBA-like domain	DNA ligase 6 OS=Arabidopsis thaliana OX=3702 GN=LIG6 PE=2 SV=1	L	Replication, recombination and repair	DNA ligase 6 isoform X2 [Aegilops tauschii subsp. tauschii]
EsiH03g0026880	--	--	Molecular Function: nucleic acid binding (GO:0003676);; Molecular Function: alpha-amylase activity (GO:0004556);; Molecular Function: calcium ion binding (GO:0005509);; Molecular Function: GTP binding (GO:0005525);; Cellular Component: mitochondrion (GO:0005739);; Biological Process: carbohydrate metabolic process (GO:0005975);; Biological Process: small GTPase mediated signal transduction (GO:00…	--	--	--	--	--	--	S	Function unknown	unnamed protein product [Triticum aestivum]
EsiH03g0026870	--	--	Molecular Function: nitronate monooxygenase activity (GO:0018580);; Biological Process: oxidation-reduction process (GO:0055114);;	--	--	--	--	--	--	S	Function unknown	predicted protein [Hordeum vulgare subsp. vulgare]
EsiH03g0019510	[O]	Posttranslational modification, protein turnover, chaperones	Molecular Function: cysteine-type endopeptidase activity (GO:0004197);; Cellular Component: extracellular space (GO:0005615);; Cellular Component: lysosome (GO:0005764);; Cellular Component: integral component of membrane (GO:0016021);; Biological Process: proteolysis involved in cellular protein catabolic process (GO:0051603);;	K16292|0|bdi:100827974|K16292 KDEL-tailed cysteine endopeptidase [EC:3.4.22.-] | (RefSeq) thiol protease SEN102-like	--	[O]	Posttranslational modification, protein turnover, chaperones	Papain family cysteine protease;; Cathepsin propeptide inhibitor domain (I29);; Peptidase C1-like family	KDEL-tailed cysteine endopeptidase CEP1 OS=Arabidopsis thaliana OX=3702 GN=CEP1 PE=1 SV=1	O	Posttranslational modification, protein turnover, chaperones	thiol protease SEN102-like [Aegilops tauschii subsp. tauschii]
EsiH04g0022820	--	--	Cellular Component: endoplasmic reticulum (GO:0005783);; Biological Process: protein glycosylation (GO:0006486);; Cellular Component: integral component of membrane (GO:0016021);; Biological Process: endoplasmic reticulum unfolded protein response (GO:0030968);;	--	--	[S]	Function unknown	Ribosome associated membrane protein RAMP4	--	U	Intracellular trafficking, secretion, and vesicular transport	stress-associated endoplasmic reticulum protein 2-like [Aegilops tauschii subsp. tauschii]
EsiH04g0015130	[TK]	Signal transduction mechanisms ;; Transcription	Biological Process: phosphorelay signal transduction system (GO:0000160);; Molecular Function: DNA binding (GO:0003677);; Molecular Function: transcription factor activity, sequence-specific DNA binding (GO:0003700);; Cellular Component: nucleus (GO:0005634);; Biological Process: regulation of transcription, DNA-templated (GO:0006355);; Biological Process: cytokinin-activated signaling pathway (G…	K14491|0|bdi:100821963|K14491 two-component response regulator ARR-B family | (RefSeq) two-component response regulator ORR21	ko04075:Plant hormone signal transduction	[K]	Transcription	Response regulator receiver domain;; Myb-like DNA-binding domain	Two-component response regulator ORR21 OS=Oryza sativa subsp. japonica OX=39947 GN=RR21 PE=2 SV=1	T	Signal transduction mechanisms	predicted protein [Hordeum vulgare subsp. vulgare]
EsiH04g0031250	[J]	Translation, ribosomal structure and biogenesis	Molecular Function: ATP binding (GO:0005524);; Cellular Component: mitochondrion (GO:0005739);; Cellular Component: chloroplast stroma (GO:0009570);; Molecular Function: transferase activity (GO:0016740);; Cellular Component: glutamyl-tRNA(Gln) amidotransferase complex (GO:0030956);; Biological Process: mitochondrial translation (GO:0032543);; Molecular Function: glutaminyl-tRNA synthase (glutami…	K02434|0|bdi:100835563|K02434 aspartyl-tRNA(Asn)/glutamyl-tRNA(Gln) amidotransferase subunit B [EC:6.3.5.6 6.3.5.7] | (RefSeq) glutamyl-tRNA(Gln) amidotransferase subunit B, chloroplastic/mitochondrial	ko00970:Aminoacyl-tRNA biosynthesis	[J]	Translation, ribosomal structure and biogenesis	GatB/GatE catalytic domain;; GatB domain	Glutamyl-tRNA(Gln) amidotransferase subunit B, chloroplastic/mitochondrial OS=Oryza sativa subsp. japonica OX=39947 GN=GATB PE=2 SV=1	J	Translation, ribosomal structure and biogenesis	predicted protein, partial [Hordeum vulgare subsp. vulgare]
EsiH05g0048290	--	--	Molecular Function: transcription factor activity, sequence-specific DNA binding (GO:0003700);; Biological Process: regulation of transcription, DNA-templated (GO:0006355);; Cellular Component: membrane (GO:0016020);; Molecular Function: sequence-specific DNA binding (GO:0043565);;	--	--	--	--	WRKY DNA -binding domain;; Plant zinc cluster domain	Protein WRKY1 OS=Zea mays OX=4577 PE=1 SV=1	K	Transcription	protein WRKY1-like [Aegilops tauschii subsp. tauschii]
EsiH05g0048240	[E]	Amino acid transport and metabolism	Biological Process: allantoin catabolic process (GO:0000256);; Molecular Function: ureidoglycolate hydrolase activity (GO:0004848);; Cellular Component: endoplasmic reticulum (GO:0005783);; Biological Process: purine nucleobase catabolic process (GO:0006145);; Biological Process: ureide catabolic process (GO:0010136);; Molecular Function: metal ion binding (GO:0046872);;	K18151|0|bdi:100836497|K18151 ureidoglycolate amidohydrolase [EC:3.5.1.116] | (RefSeq) probable ureidoglycolate hydrolase	ko00230:Purine metabolism	--	--	Peptidase family M20/M25/M40;; Peptidase family M28	Probable ureidoglycolate hydrolase OS=Oryza sativa subsp. japonica OX=39947 GN=UAH PE=1 SV=2	E	Amino acid transport and metabolism	probable ureidoglycolate hydrolase [Aegilops tauschii subsp. tauschii]
EsiH06g0023590	--	--	Molecular Function: calcium ion binding (GO:0005509);; Cellular Component: nitrite reductase complex [NAD(P)H] (GO:0009344);; Cellular Component: chloroplast thylakoid membrane (GO:0009535);; Cellular Component: photosystem II oxygen evolving complex (GO:0009654);; Biological Process: photosynthetic electron transport chain (GO:0009767);; Cellular Component: extrinsic component of membrane (GO:00…	K08901|2.0857e-82|bdi:100839323|K08901 photosystem II oxygen-evolving enhancer protein 3 | (RefSeq) photosynthetic NDH subunit of lumenal location 2, chloroplastic	ko00195:Photosynthesis	--	--	Oxygen evolving enhancer protein 3 (PsbQ)	Photosynthetic NDH subunit of lumenal location 2, chloroplastic OS=Arabidopsis thaliana OX=3702 GN=PNSL2 PE=1 SV=1	S	Function unknown	photosynthetic NDH subunit of lumenal location 2, chloroplastic-like [Aegilops tauschii subsp. tauschii]
EsiH06g0011880	[J]	Translation, ribosomal structure and biogenesis	Cellular Component: mitochondrion (GO:0005739);; Biological Process: proteolysis (GO:0006508);; Cellular Component: chloroplast (GO:0009507);; Biological Process: response to abscisic acid (GO:0009737);; Molecular Function: metal ion binding (GO:0046872);; Molecular Function: metalloaminopeptidase activity (GO:0070006);; Biological Process: protein initiator methionine removal (GO:0070084);;	K01265|0|bdi:100833095|K01265 methionyl aminopeptidase [EC:3.4.11.18] | (RefSeq) methionine aminopeptidase 1D, chloroplastic/mitochondrial	--	[O]	Posttranslational modification, protein turnover, chaperones	Metallopeptidase family M24	Methionine aminopeptidase 1D, chloroplastic/mitochondrial OS=Arabidopsis thaliana OX=3702 GN=MAP1D PE=1 SV=1	J	Translation, ribosomal structure and biogenesis	predicted protein [Hordeum vulgare subsp. vulgare]
EsiH07g0029930	--	--	Cellular Component: mitochondrion (GO:0005739);; Cellular Component: integral component of membrane (GO:0016021);;	--	--	--	--	Nodulin-like	Protein NUCLEAR FUSION DEFECTIVE 4 OS=Arabidopsis thaliana OX=3702 GN=NFD4 PE=3 SV=1	S	Function unknown	predicted protein [Hordeum vulgare subsp. vulgare]
EsiH07g0029470	[E]	Amino acid transport and metabolism	Molecular Function: catalytic activity (GO:0003824);;	--	--	[H]	Coenzyme transport and metabolism	--	--	E	Amino acid transport and metabolism	uncharacterized protein LOC109735900 [Aegilops tauschii subsp. tauschii]
EsiH07g0029450	[ER]	Amino acid transport and metabolism ;; General function prediction only	Molecular Function: zinc ion binding (GO:0008270);; Molecular Function: oxidoreductase activity (GO:0016491);; Biological Process: oxidation-reduction process (GO:0055114);;	K00008|0|dosa:Os08t0545200-01|K00008 L-iditol 2-dehydrogenase [EC:1.1.1.14] | (RAP-DB) Os08g0545200; Alcohol dehydrogenase superfamily, zinc-containing protein.	ko00040:Pentose and glucuronate interconversions;ko00051:Fructose and mannose metabolism	[Q]	Secondary metabolites biosynthesis, transport and catabolism	Alcohol dehydrogenase GroES-like domain;; Zinc-binding dehydrogenase;; Glucose dehydrogenase C-terminus;; Zinc-binding dehydrogenase	Sorbitol dehydrogenase OS=Arabidopsis thaliana OX=3702 GN=SDH PE=1 SV=1	E	Amino acid transport and metabolism	sorbitol dehydrogenase [Aegilops tauschii subsp. tauschii]
EsiH07g0022340	--	--	Cellular Component: Golgi membrane (GO:0000139);; Biological Process: protein glycosylation (GO:0006486);; Molecular Function: galactosyltransferase activity (GO:0008378);; Cellular Component: integral component of membrane (GO:0016021);;	K20855|0|bdi:100823235|K20855 beta-1,3-galactosyltransferase 1/2/3/4/5/7/8 [EC:2.4.1.-] | (RefSeq) probable beta-1,3-galactosyltransferase 2	--	[G]	Carbohydrate transport and metabolism	Galactosyltransferase;; Domain of unknown function (DUF4094)	Probable beta-1,3-galactosyltransferase 2 OS=Arabidopsis thaliana OX=3702 GN=B3GALT2 PE=2 SV=1	S	Function unknown	predicted protein [Hordeum vulgare subsp. vulgare]
EsiH07g0017960	[G]	Carbohydrate transport and metabolism	Molecular Function: alpha-amylase activity (GO:0004556);; Molecular Function: calcium ion binding (GO:0005509);; Biological Process: carbohydrate metabolic process (GO:0005975);;	K01176|0|bdi:100835083|K01176 alpha-amylase [EC:3.2.1.1] | (RefSeq) alpha-amylase type A isozyme	ko00500:Starch and sucrose metabolism	[G]	Carbohydrate transport and metabolism	Alpha-amylase C-terminal beta-sheet domain;; Alpha amylase, catalytic domain;; Glycosyl hydrolase family 70	Alpha-amylase type A isozyme OS=Hordeum vulgare OX=4513 GN=AMY1.1 PE=1 SV=1	G	Carbohydrate transport and metabolism	alpha amylase, partial [Hordeum vulgare subsp. spontaneum]
EsiH07g0012880	--	--	Biological Process: transport (GO:0006810);; Cellular Component: integral component of membrane (GO:0016021);;	K15289|8.15188e-158|sita:101776754|K15289 solute carrier family 35, member F5 | (RefSeq) uncharacterized vacuolar membrane protein YML018C	--	[S]	Function unknown	EamA-like transporter family;; Solute carrier family 35	--	EG	--	predicted protein [Hordeum vulgare subsp. vulgare]
EsiH07g0009190	[G]	Carbohydrate transport and metabolism	Biological Process: carbohydrate metabolic process (GO:0005975);; Cellular Component: plastid (GO:0009536);; Biological Process: dephosphorylation (GO:0016311);; Molecular Function: fructose 1,6-bisphosphate 1-phosphatase activity (GO:0042132);;	K03841|0|sbi:SORBI_10g026540|K03841 fructose-1,6-bisphosphatase I [EC:3.1.3.11] | (RefSeq) SORBIDRAFT_10g026540, Sb10g026540; hypothetical protein	ko00010:Glycolysis / Gluconeogenesis;ko00030:Pentose phosphate pathway;ko00051:Fructose and mannose metabolism;ko00710:Carbon fixation in photosynthetic organisms;ko01200:Carbon metabolism	[G]	Carbohydrate transport and metabolism	Fructose-1-6-bisphosphatase, N-terminal domain	Fructose-1,6-bisphosphatase, chloroplastic OS=Spinacia oleracea OX=3562 PE=1 SV=2	G	Carbohydrate transport and metabolism	fructose-1,6-bisphosphatase, chloroplastic [Aegilops tauschii subsp. tauschii]
EsiH07g0009180	[M]	Cell wall/membrane/envelope biogenesis	Molecular Function: protein serine/threonine kinase activity (GO:0004674);; Molecular Function: ATP binding (GO:0005524);; Biological Process: protein phosphorylation (GO:0006468);;	--	--	[T]	Signal transduction mechanisms	Protein kinase domain;; Protein tyrosine kinase	Receptor-like cytosolic serine/threonine-protein kinase RBK1 OS=Arabidopsis thaliana OX=3702 GN=RBK1 PE=1 SV=1	T	Signal transduction mechanisms	predicted protein [Hordeum vulgare subsp. vulgare]
EsiS01g0029710	--	--	Biological Process: spliceosomal complex assembly (GO:0000245);; Cellular Component: spliceosomal complex (GO:0005681);; Cellular Component: U5 snRNP (GO:0005682);; Cellular Component: viral nucleocapsid (GO:0019013);; Cellular Component: U4/U6 x U5 tri-snRNP complex (GO:0046540);;	K12859|2.24807e-100|bdi:100842233|K12859 U5 snRNP protein, DIM1 family | (RefSeq) thioredoxin-like protein YLS8	ko03040:Spliceosome	[AD]	--	Mitosis protein DIM1;; Thioredoxin	Thioredoxin-like protein YLS8 OS=Arabidopsis thaliana OX=3702 GN=YLS8 PE=2 SV=1	S	Function unknown	thioredoxin-like protein YLS8 [Aegilops tauschii subsp. tauschii]
EsiS01g0026030	[T]	Signal transduction mechanisms	Molecular Function: protein serine/threonine phosphatase activity (GO:0004722);; Cellular Component: mitochondrion (GO:0005739);; Biological Process: protein dephosphorylation (GO:0006470);; Cellular Component: protein serine/threonine phosphatase complex (GO:0008287);; Cellular Component: plastid (GO:0009536);; Molecular Function: kinase activity (GO:0016301);; Biological Process: phosphorylatio…	K14803|0|bdi:100826778|K14803 protein phosphatase PTC2/3 [EC:3.1.3.16] | (RefSeq) probable protein phosphatase 2C 47	--	[T]	Signal transduction mechanisms	Protein phosphatase 2C	Probable protein phosphatase 2C 47 OS=Arabidopsis thaliana OX=3702 GN=At3g51470 PE=1 SV=1	T	Signal transduction mechanisms	probable protein phosphatase 2C 47 isoform X1 [Aegilops tauschii subsp. tauschii]
EsiS01g0024960	[M]	Cell wall/membrane/envelope biogenesis	Molecular Function: glycogenin glucosyltransferase activity (GO:0008466);; Cellular Component: integral component of membrane (GO:0016021);;	--	--	[G]	Carbohydrate transport and metabolism	--	Putative glucuronosyltransferase PGSIP7 OS=Arabidopsis thaliana OX=3702 GN=PGSIP7 PE=3 SV=1	O	Posttranslational modification, protein turnover, chaperones	predicted protein, partial [Hordeum vulgare subsp. vulgare]
EsiS01g0024540	[G]	Carbohydrate transport and metabolism	Biological Process: maltose biosynthetic process (GO:0000024);; Biological Process: starch catabolic process (GO:0005983);; Cellular Component: chloroplast stroma (GO:0009570);; Molecular Function: beta-amylase activity (GO:0016161);;	K01177|0|sita:101761744|K01177 beta-amylase [EC:3.2.1.2] | (RefSeq) beta-amylase 3, chloroplastic	ko00500:Starch and sucrose metabolism	--	--	Glycosyl hydrolase family 14	Beta-amylase 3, chloroplastic OS=Arabidopsis thaliana OX=3702 GN=BAM3 PE=1 SV=3	S	Function unknown	beta-amylase 3, chloroplastic [Aegilops tauschii subsp. tauschii]
EsiS01g0024530	[R]	General function prediction only	Molecular Function: cysteine-type endopeptidase activity (GO:0004197);; Biological Process: proteolysis (GO:0006508);; Biological Process: positive regulation of programmed cell death (GO:0043068);;	--	--	[DO]	--	Caspase domain;; LSD1 zinc finger	Metacaspase-1 OS=Arabidopsis thaliana OX=3702 GN=AMC1 PE=1 SV=1	O	Posttranslational modification, protein turnover, chaperones	metacaspase 9 [Aegilops tauschii]
EsiS01g0024490	[T]	Signal transduction mechanisms	Molecular Function: protein serine/threonine kinase activity (GO:0004674);; Molecular Function: ATP binding (GO:0005524);; Cellular Component: nucleus (GO:0005634);; Cellular Component: cytoplasm (GO:0005737);; Biological Process: protein phosphorylation (GO:0006468);; Biological Process: abscisic acid-activated signaling pathway (GO:0009738);; Biological Process: intracellular signal transductio…	K14498|0|bdi:100826573|K14498 serine/threonine-protein kinase SRK2 [EC:2.7.11.1] | (RefSeq) SAPK3; serine/threonine-protein kinase SAPK3-like	ko04075:Plant hormone signal transduction	[T]	Signal transduction mechanisms	Protein kinase domain;; Protein tyrosine kinase	Serine/threonine-protein kinase SAPK3 OS=Oryza sativa subsp. japonica OX=39947 GN=SAPK3 PE=1 SV=1	T	Signal transduction mechanisms	serine/threonine-protein kinase SAPK3 [Aegilops tauschii subsp. tauschii]
EsiS01g0024300	--	--	Biological Process: protein depalmitoylation (GO:0002084);; Cellular Component: lysosome (GO:0005764);; Molecular Function: palmitoyl-(protein) hydrolase activity (GO:0008474);; Cellular Component: integral component of membrane (GO:0016021);;	K01074|0|bdi:100834215|K01074 palmitoyl-protein thioesterase [EC:3.1.2.22] | (RefSeq) palmitoyl-protein thioesterase 1-like	ko00062:Fatty acid elongation;ko01212:Fatty acid metabolism	[IO]	--	Palmitoyl protein thioesterase	--	S	Function unknown	palmitoyl-protein thioesterase 1-like [Aegilops tauschii subsp. tauschii]
EsiS01g0023930	--	--	Cellular Component: endosome (GO:0005768);; Biological Process: endocytosis (GO:0006897);; Biological Process: vesicle organization (GO:0016050);; Cellular Component: extrinsic component of membrane (GO:0019898);; Molecular Function: phosphatidylinositol binding (GO:0035091);;	--	--	[U]	Intracellular trafficking, secretion, and vesicular transport	PX domain;; Vps5 C terminal like	Sorting nexin 2B OS=Arabidopsis thaliana OX=3702 GN=SNX2B PE=1 SV=1	U	Intracellular trafficking, secretion, and vesicular transport	sorting nexin 2B-like [Aegilops tauschii subsp. tauschii]
EsiS01g0023820	[H]	Coenzyme transport and metabolism	Cellular Component: mitochondrion (GO:0005739);; Biological Process: chlorophyll biosynthetic process (GO:0015995);; Cellular Component: integral component of membrane (GO:0016021);; Cellular Component: chloroplast membrane (GO:0031969);; Molecular Function: chlorophyll synthetase activity (GO:0046408);;	K04040|0|bdi:100841031|K04040 chlorophyll/bacteriochlorophyll a synthase [EC:2.5.1.62 2.5.1.133] | (RefSeq) chlorophyll synthase, chloroplastic	ko00860:Porphyrin and chlorophyll metabolism	--	--	UbiA prenyltransferase family	Chlorophyll synthase, chloroplastic OS=Avena sativa OX=4498 GN=CHLG PE=1 SV=1	H	Coenzyme transport and metabolism	chlorophyll synthase, chloroplastic [Aegilops tauschii subsp. tauschii]
EsiS01g0021260	[G]	Carbohydrate transport and metabolism	Molecular Function: protein kinase activity (GO:0004672);; Molecular Function: ATP binding (GO:0005524);; Cellular Component: cytosol (GO:0005829);; Biological Process: pyruvate metabolic process (GO:0006090);; Biological Process: protein phosphorylation (GO:0006468);; Biological Process: lipid biosynthetic process (GO:0008610);; Biological Process: response to light stimulus (GO:0009416);; Cellu…	K01006|0|bdi:100840523|K01006 pyruvate, orthophosphate dikinase [EC:2.7.9.1] | (RefSeq) pyruvate, phosphate dikinase 2	ko00620:Pyruvate metabolism;ko00710:Carbon fixation in photosynthetic organisms;ko01200:Carbon metabolism	--	--	PEP-utilising enzyme, TIM barrel domain;; Pyruvate phosphate dikinase, PEP/pyruvate binding domain;; PEP-utilising enzyme, mobile domain	Pyruvate, phosphate dikinase 1, chloroplastic OS=Oryza sativa subsp. japonica OX=39947 GN=PPDK1 PE=1 SV=1	G	Carbohydrate transport and metabolism	pyruvate, phosphate dikinase 2 [Aegilops tauschii subsp. tauschii]
EsiS01g0019800	[T]	Signal transduction mechanisms	Molecular Function: voltage-gated potassium channel activity (GO:0005249);; Cellular Component: integral component of plasma membrane (GO:0005887);; Cellular Component: plasmodesma (GO:0009506);; Cellular Component: plastid (GO:0009536);; Biological Process: regulation of ion transmembrane transport (GO:0034765);; Biological Process: regulation of membrane potential (GO:0042391);; Molecular Funct…	--	--	[PT]	--	Ion transport protein;; KHA, dimerisation domain of potassium ion channel;; Ankyrin repeats (3 copies);; Ankyrin repeats (many copies);; Ankyrin repeats (many copies);; Cyclic nucleotide-binding domain;; Ion channel;; Ankyrin repeat;; Ankyrin repeat	Potassium channel AKT2 OS=Oryza sativa subsp. japonica OX=39947 GN=Os05g0428700 PE=2 SV=1	U	Intracellular trafficking, secretion, and vesicular transport	inwardly rectifying potassium channel AKT2 [Hordeum vulgare]
EsiS01g0001060	--	--	Biological Process: anaerobic respiration (GO:0009061);; Molecular Function: oxidoreductase activity, acting on single donors with incorporation of molecular oxygen, incorporation of two atoms of oxygen (GO:0016702);; Biological Process: peptidyl-cysteine oxidation (GO:0018171);; Biological Process: detection of hypoxia (GO:0070483);;	K10712|5.34387e-110|bdi:100842232|K10712 cysteamine dioxygenase [EC:1.13.11.19] | (RefSeq) plant cysteine oxidase 1-like	ko00430:Taurine and hypotaurine metabolism	[S]	Function unknown	PCO_ADO	Plant cysteine oxidase 1 OS=Arabidopsis thaliana OX=3702 GN=PCO1 PE=1 SV=1	S	Function unknown	plant cysteine oxidase 2-like [Aegilops tauschii subsp. tauschii]
EsiS02g0038340	--	--	Cellular Component: COP9 signalosome (GO:0008180);; Biological Process: protein deneddylation (GO:0010388);; Cellular Component: integral component of membrane (GO:0016021);;	K12180|3.07488e-164|bdi:100844852|K12180 COP9 signalosome complex subunit 7 | (RefSeq) COP9 signalosome complex subunit 7	--	[OT]	--	PCI domain	COP9 signalosome complex subunit 7 OS=Arabidopsis thaliana OX=3702 GN=CSN7 PE=1 SV=1	O	Posttranslational modification, protein turnover, chaperones	COP9 signalosome complex subunit 7 isoform X1 [Aegilops tauschii subsp. tauschii]
EsiS02g0009930	[R]	General function prediction only	Cellular Component: cytosol (GO:0005829);;	K03255|0|bdi:100830075|K03255 protein TIF31 | (RefSeq) protein TSS	--	[R]	General function prediction only	Tetratricopeptide repeat;; Translation initiation factor eIF3 subunit 135;; Tetratricopeptide repeat;; Mitochondrial function, CLU-N-term;; Tetratricopeptide repeat;; Ataxin-2 C-terminal region	Protein TSS OS=Arabidopsis thaliana OX=3702 GN=TSS PE=1 SV=1	S	Function unknown	protein TSS-like [Aegilops tauschii subsp. tauschii]
EsiS03g0030100	[R]	General function prediction only	Cellular Component: nucleus (GO:0005634);; Cellular Component: cytosol (GO:0005829);; Biological Process: cytokinin biosynthetic process (GO:0009691);; Cellular Component: integral component of membrane (GO:0016021);; Molecular Function: hydrolase activity, hydrolyzing N-glycosyl compounds (GO:0016799);;	K06966|2.32005e-136|bdi:100841130|K06966 uncharacterized protein | (RefSeq) probable cytokinin riboside 5'-monophosphate phosphoribohydrolase LOGL1	--	--	--	Possible lysine decarboxylase	Probable cytokinin riboside 5&apos;-monophosphate phosphoribohydrolase LOGL1 OS=Oryza sativa subsp. japonica OX=39947 GN=LOGL1 PE=2 SV=1	S	Function unknown	probable cytokinin riboside 5&apos;-monophosphate phosphoribohydrolase LOGL1 [Aegilops tauschii subsp. tauschii]
EsiS03g0029840	--	--	Cellular Component: plastid (GO:0009536);; Cellular Component: integral component of membrane (GO:0016021);;	--	--	--	--	--	--	S	Function unknown	unnamed protein product [Triticum aestivum]
EsiS03g0029800	[H]	Coenzyme transport and metabolism	Molecular Function: dimethylallyltranstransferase activity (GO:0004161);; Molecular Function: geranyltranstransferase activity (GO:0004337);; Cellular Component: cytoplasm (GO:0005737);; Biological Process: farnesyl diphosphate biosynthetic process (GO:0045337);;	K00787|0|bdi:100834798|K00787 farnesyl diphosphate synthase [EC:2.5.1.1 2.5.1.10] | (RefSeq) farnesyl pyrophosphate synthase-like	ko00900:Terpenoid backbone biosynthesis	[H]	Coenzyme transport and metabolism	Polyprenyl synthetase	Farnesyl pyrophosphate synthase OS=Zea mays OX=4577 GN=FPS PE=2 SV=1	H	Coenzyme transport and metabolism	predicted protein [Hordeum vulgare subsp. vulgare]
EsiS03g0016140	--	--	Cellular Component: chloroplast thylakoid membrane (GO:0009535);; Cellular Component: integral component of membrane (GO:0016021);;	--	--	[R]	General function prediction only	--	Rhodanese-like domain-containing protein 4A, chloroplastic OS=Arabidopsis thaliana OX=3702 GN=STR4A PE=2 SV=1	S	Function unknown	unnamed protein product [Triticum aestivum]
EsiS03g0042250	[T]	Signal transduction mechanisms	Molecular Function: protein serine/threonine kinase activity (GO:0004674);; Molecular Function: ATP binding (GO:0005524);; Biological Process: protein phosphorylation (GO:0006468);;	--	--	[D]	Cell cycle control, cell division, chromosome partitioning	Protein kinase domain;; Protein tyrosine kinase	Probable serine/threonine-protein kinase At1g09600 OS=Arabidopsis thaliana OX=3702 GN=At1g09600 PE=3 SV=1	T	Signal transduction mechanisms	probable serine/threonine-protein kinase At1g54610 isoform X1 [Aegilops tauschii subsp. tauschii]
EsiS03g0042240	--	--	Molecular Function: acetylglucosaminyltransferase activity (GO:0008375);; Cellular Component: integral component of membrane (GO:0016021);;	--	--	[G]	Carbohydrate transport and metabolism	Core-2/I-Branching enzyme	Beta-glucuronosyltransferase GlcAT14B OS=Arabidopsis thaliana OX=3702 GN=GLCAT14B PE=2 SV=1	S	Function unknown	predicted protein [Hordeum vulgare subsp. vulgare]
EsiS04g0025700	[G]	Carbohydrate transport and metabolism	Molecular Function: mannose-6-phosphate isomerase activity (GO:0004476);; Biological Process: carbohydrate metabolic process (GO:0005975);; Molecular Function: zinc ion binding (GO:0008270);; Biological Process: GDP-mannose biosynthetic process (GO:0009298);;	K01809|0|bdi:100843298|K01809 mannose-6-phosphate isomerase [EC:5.3.1.8] | (RefSeq) mannose-6-phosphate isomerase 1-like	ko00051:Fructose and mannose metabolism;ko00520:Amino sugar and nucleotide sugar metabolism	[G]	Carbohydrate transport and metabolism	Phosphomannose isomerase type I	Mannose-6-phosphate isomerase 1 OS=Arabidopsis thaliana OX=3702 GN=PMI1 PE=1 SV=1	G	Carbohydrate transport and metabolism	mannose-6-phosphate isomerase 1-like [Aegilops tauschii subsp. tauschii]
EsiS04g0025680	--	--	Molecular Function: DNA binding (GO:0003677);; Cellular Component: nucleus (GO:0005634);; Molecular Function: protein dimerization activity (GO:0046983);;	--	--	--	--	--	Transcription factor BHLH062 OS=Oryza sativa subsp. japonica OX=39947 GN=BHLH062 PE=1 SV=1	S	Function unknown	transcription factor bHLH47-like [Aegilops tauschii subsp. tauschii]
EsiS04g0036410	--	--	Cellular Component: Golgi membrane (GO:0000139);; Cellular Component: mitochondrion (GO:0005739);; Biological Process: protein glycosylation (GO:0006486);; Molecular Function: galactosyltransferase activity (GO:0008378);; Cellular Component: integral component of membrane (GO:0016021);; Molecular Function: carbohydrate binding (GO:0030246);;	K20843|0|bdi:100830687|K20843 hydroxyproline O-galactosyltransferase 2/3/4/5/6 [EC:2.4.1.-] | (RefSeq) probable beta-1,3-galactosyltransferase 19	--	[G]	Carbohydrate transport and metabolism	Galactoside-binding lectin;; Galactosyltransferase	Hydroxyproline O-galactosyltransferase GALT6 OS=Arabidopsis thaliana OX=3702 GN=GALT6 PE=2 SV=2	S	Function unknown	hydroxyproline O-galactosyltransferase GALT5-like isoform X2 [Aegilops tauschii subsp. tauschii]
EsiS04g0036380	--	--	Cellular Component: vacuole (GO:0005773);;	--	--	--	--	Protein of unknown function, DUF538	--	S	Function unknown	uncharacterized protein LOC109741734 [Aegilops tauschii subsp. tauschii]
EsiS04g0030490	--	--	Molecular Function: RNA polymerase I activity (GO:0001054);; Molecular Function: RNA polymerase III activity (GO:0001056);; Molecular Function: DNA binding (GO:0003677);; Cellular Component: DNA-directed RNA polymerase III complex (GO:0005666);; Cellular Component: DNA-directed RNA polymerase I complex (GO:0005736);; Biological Process: transcription from RNA polymerase I promoter (GO:0006360);; …	K03020|5.70999e-68|bdi:100834353|K03020 DNA-directed RNA polymerases I and III subunit RPAC2 | (RefSeq) DNA-directed RNA polymerases I and III subunit RPAC2	ko00230:Purine metabolism;ko00240:Pyrimidine metabolism;ko03020:RNA polymerase	[K]	Transcription	RNA polymerase Rpb3/Rpb11 dimerisation domain;; RNA polymerase Rpb3/Rpb11 dimerisation domain	DNA-directed RNA polymerases II, IV and V subunit 11 OS=Arabidopsis thaliana OX=3702 GN=NRPB11 PE=1 SV=1	K	Transcription	DNA-directed RNA polymerases I and III subunit RPAC2 [Aegilops tauschii subsp. tauschii]
EsiS05g0041950	--	--	Molecular Function: DNA binding (GO:0003677);; Cellular Component: nucleus (GO:0005634);; Molecular Function: zinc ion binding (GO:0008270);; Biological Process: response to light stimulus (GO:0009416);; Biological Process: regulation of flower development (GO:0009909);;	--	--	[K]	Transcription	CCT motif;; B-box zinc finger	Zinc finger protein CO3 OS=Oryza sativa subsp. japonica OX=39947 GN=CO3 PE=2 SV=1	K	Transcription	CONSTANS-like protein [Hordeum vulgare subsp. vulgare]
EsiS05g0034350	--	--	Cellular Component: lipid droplet (GO:0005811);;	--	--	--	--	Protein of unknown function (DUF1264)	Oil body-associated protein 1A OS=Zea mays OX=4577 GN=OBAP1A PE=2 SV=1	S	Function unknown	oil body-associated protein 1A [Aegilops tauschii subsp. tauschii]
EsiS05g0020810	[J]	Translation, ribosomal structure and biogenesis	Molecular Function: nucleotide binding (GO:0000166);; Molecular Function: nucleic acid binding (GO:0003676);; Cellular Component: plastid (GO:0009536);; Cellular Component: viral nucleocapsid (GO:0019013);; Cellular Component: intracellular ribonucleoprotein complex (GO:0030529);;	--	--	[R]	General function prediction only	RNA recognition motif. (a.k.a. RRM, RBD, or RNP domain);; RNA recognition motif	31 kDa ribonucleoprotein, chloroplastic OS=Nicotiana sylvestris OX=4096 PE=1 SV=1	S	Function unknown	28 kDa ribonucleoprotein, chloroplastic-like [Aegilops tauschii subsp. tauschii]
EsiS05g0014810	[O]	Posttranslational modification, protein turnover, chaperones	Molecular Function: glutathione transferase activity (GO:0004364);; Cellular Component: cytoplasm (GO:0005737);; Biological Process: glutathione metabolic process (GO:0006749);;	K00799|5.18859e-124|bdi:100828479|K00799 glutathione S-transferase [EC:2.5.1.18] | (RefSeq) probable glutathione S-transferase GSTF1	ko00480:Glutathione metabolism	[O]	Posttranslational modification, protein turnover, chaperones	Glutathione S-transferase, N-terminal domain;; Glutathione S-transferase, C-terminal domain;; Glutathione S-transferase, N-terminal domain;; Glutathione S-transferase, C-terminal domain;; Glutathione S-transferase, C-terminal domain;; Glutathione S-transferase, N-terminal domain	Probable glutathione S-transferase GSTF1 OS=Oryza sativa subsp. japonica OX=39947 GN=GSTF1 PE=1 SV=2	O	Posttranslational modification, protein turnover, chaperones	putative glutathione S-transferase GSTF1 [Triticum urartu]
EsiS06g0026340	[H]	Coenzyme transport and metabolism	Molecular Function: GTP cyclohydrolase II activity (GO:0003935);; Molecular Function: GTP binding (GO:0005525);; Molecular Function: 3,4-dihydroxy-2-butanone-4-phosphate synthase activity (GO:0008686);; Biological Process: riboflavin biosynthetic process (GO:0009231);; Cellular Component: chloroplast (GO:0009507);; Molecular Function: metal ion binding (GO:0046872);;	K14652|0|bdi:100832262|K14652 3,4-dihydroxy 2-butanone 4-phosphate synthase / GTP cyclohydrolase II [EC:4.1.99.12 3.5.4.25] | (RefSeq) probable bifunctional riboflavin biosynthesis protein RIBA 2, chloroplastic	ko00740:Riboflavin metabolism	[H]	Coenzyme transport and metabolism	3,4-dihydroxy-2-butanone 4-phosphate synthase;; GTP cyclohydrolase II	Probable bifunctional riboflavin biosynthesis protein RIBA 2, chloroplastic OS=Oryza sativa subsp. japonica OX=39947 GN=RIBA2 PE=2 SV=1	H	Coenzyme transport and metabolism	probable bifunctional riboflavin biosynthesis protein RIBA 2, chloroplastic isoform X1 [Aegilops tauschii subsp. tauschii]
EsiS06g0026320	[R]	General function prediction only	Molecular Function: GTP binding (GO:0005525);; Biological Process: small GTPase mediated signal transduction (GO:0007264);; Biological Process: protein transport (GO:0015031);; Cellular Component: endoplasmic reticulum-Golgi intermediate compartment membrane (GO:0033116);;	K07877|1.27452e-141|obr:102709711|K07877 Ras-related protein Rab-2A | (RefSeq) ras-related protein Rab-2-B-like	--	[U]	Intracellular trafficking, secretion, and vesicular transport	Ras family;; Ras of Complex, Roc, domain of DAPkinase;; ADP-ribosylation factor family;; 50S ribosome-binding GTPase	Ras-related protein Rab-2-B OS=Zea mays OX=4577 GN=RAB2B PE=2 SV=1	S	Function unknown	PREDICTED: ras-related protein Rab-2-B-like [Oryza brachyantha]
EsiS06g0016760	[I]	Lipid transport and metabolism	Cellular Component: chloroplast (GO:0009507);; Biological Process: vitamin E biosynthetic process (GO:0010189);; Biological Process: methylation (GO:0032259);; Molecular Function: tocopherol O-methyltransferase activity (GO:0050342);; Molecular Function: 2-methyl-6-phytyl-1,4-benzoquinone methyltransferase activity (GO:0051741);;	K05928|0|bdi:100836877|K05928 tocopherol O-methyltransferase [EC:2.1.1.95] | (RefSeq) probable tocopherol O-methyltransferase, chloroplastic	ko00130:Ubiquinone and other terpenoid-quinone biosynthesis	[IR]	--	Methyltransferase domain;; Methyltransferase domain;; Methyltransferase domain;; Methyltransferase domain;; Mycolic acid cyclopropane synthetase;; Methyltransferase domain;; ubiE/COQ5 methyltransferase family	Probable tocopherol O-methyltransferase, chloroplastic OS=Oryza sativa subsp. japonica OX=39947 GN=VTE4 PE=2 SV=1	S	Function unknown	gamma-tocopherol methyl transferase [Triticum aestivum]
EsiH03g0019500	--	--	--	--	--	--	--	--	--	--	--	predicted protein [Hordeum vulgare subsp. vulgare]
EsiS01g0024470	--	--	--	--	--	[K]	Transcription	Myb/SANT-like DNA-binding domain;; Alcohol dehydrogenase transcription factor Myb/SANT-like	Trihelix transcription factor ASIL2 OS=Arabidopsis thaliana OX=3702 GN=ASIL2 PE=1 SV=1	K	Transcription	trihelix transcription factor ASIL1-like [Aegilops tauschii subsp. tauschii]
EsiS02g0037360	--	--	--	--	--	--	--	MULE transposase domain;; FAR1 DNA-binding domain	Protein FAR1-RELATED SEQUENCE 11 OS=Arabidopsis thaliana OX=3702 GN=FRS11 PE=1 SV=1	S	Function unknown	protein FAR1-RELATED SEQUENCE 12-like [Aegilops tauschii subsp. tauschii]
EsiS04g0010130	--	--	--	--	--	--	--	GRAM domain	GEM-like protein 1 OS=Arabidopsis thaliana OX=3702 GN=FIP1 PE=1 SV=1	S	Function unknown	predicted protein [Hordeum vulgare subsp. vulgare]
EsiS04g0036360	--	--	--	--	--	--	--	Protein of unknown function (DUF1618)	--	S	Function unknown	uncharacterized protein LOC109784554 [Aegilops tauschii subsp. tauschii]
EsiS05g0050330	[L]	Replication, recombination and repair	--	--	--	--	--	Calmodulin binding protein-like;; Reverse transcriptase (RNA-dependent DNA polymerase)	Calmodulin-binding protein 60 B OS=Arabidopsis thaliana OX=3702 GN=CBP60B PE=2 SV=1	S	Function unknown	Retrovirus-related Pol polyprotein LINE-1 [Zea mays]
EsiS06g0008680	[G]	Carbohydrate transport and metabolism	Molecular Function: zinc ion binding (GO:0008270);; Biological Process: lignin biosynthetic process (GO:0009809);; Molecular Function: cinnamyl-alcohol dehydrogenase activity (GO:0045551);; Molecular Function: sinapyl alcohol dehydrogenase activity (GO:0052747);; Biological Process: oxidation-reduction process (GO:0055114);;	K00083|0|bdi:100835744|K00083 cinnamyl-alcohol dehydrogenase [EC:1.1.1.195] | (RefSeq) putative cinnamyl alcohol dehydrogenase 5	ko00940:Phenylpropanoid biosynthesis	[Q]	Secondary metabolites biosynthesis, transport and catabolism	Alcohol dehydrogenase GroES-like domain;; Zinc-binding dehydrogenase	Probable cinnamyl alcohol dehydrogenase 5 OS=Oryza sativa subsp. japonica OX=39947 GN=CAD5 PE=3 SV=2	C	Energy production and conversion	probable cinnamyl alcohol dehydrogenase 5 [Aegilops tauschii subsp. tauschii]
EsiS06g0008320	--	--	Biological Process: dolichol-linked oligosaccharide biosynthetic process (GO:0006488);; Cellular Component: integral component of membrane (GO:0016021);;	K09660|6.1351e-142|bdi:100829270|K09660 mannose-P-dolichol utilization defect 1 | (RefSeq) mannose-P-dolichol utilization defect 1 protein homolog 2	--	[R]	General function prediction only	PQ loop repeat	Mannose-P-dolichol utilization defect 1 protein homolog 2 OS=Arabidopsis thaliana OX=3702 GN=At4g07390 PE=2 SV=1	S	Function unknown	mannose-P-dolichol utilization defect 1 protein homolog 2 isoform X1 [Aegilops tauschii subsp. tauschii]
EsiS07g0028510	--	--	Molecular Function: DNA binding (GO:0003677);; Cellular Component: nucleus (GO:0005634);; Biological Process: regulation of transcription, DNA-templated (GO:0006355);;	K12133|0|bdi:100838310|K12133 MYB-related transcription factor LHY | (RefSeq) protein CCA1	ko04712:Circadian rhythm - plant	[O]	Posttranslational modification, protein turnover, chaperones	Myb-like DNA-binding domain	Protein LHY OS=Arabidopsis thaliana OX=3702 GN=LHY PE=1 SV=2	K	Transcription	protein LHY [Aegilops tauschii subsp. tauschii]
EsiS07g0025720	--	--	Molecular Function: zinc ion binding (GO:0008270);; Cellular Component: integral component of membrane (GO:0016021);; Molecular Function: protein-cysteine S-palmitoyltransferase activity (GO:0019706);;	K16675|0|bdi:100825016|K16675 palmitoyltransferase ZDHHC9/14/18 [EC:2.3.1.225] | (RefSeq) protein S-acyltransferase 8-like	--	[R]	General function prediction only	DHHC palmitoyltransferase	Protein S-acyltransferase 8 OS=Arabidopsis thaliana OX=3702 GN=PAT08 PE=1 SV=2	S	Function unknown	predicted protein, partial [Hordeum vulgare subsp. vulgare]
EsiS07g0025680	--	--	Cellular Component: plastid (GO:0009536);;	--	--	--	--	--	--	S	Function unknown	uncharacterized protein LOC109786744 [Aegilops tauschii subsp. tauschii]
