# Supplementary material for: Genomic Dissection of Local Adaptation in Elymus sibiricus: Integrating SLAF Sequencing, Genetic Diversity, Genotype-Environment Association, and Common Garden Experiments
Source: Research Square preprint supplement (doi:10.21203/rs.3.rs-8447544/v1), 2026-01-28
Supplement: Supplementary file 2 [file 4001efb2d82deea019564dc8.xlsx]

## Sheet: Sheet1
Genes	KEGG pathway
EsiH02g0049640	ko03015:mRNA surveillance pathway
EsiH04g0031880	ko00190:Oxidative phosphorylation;ko00860:Porphyrin and chlorophyll metabolism
EsiH04g0031810	ko03050:Proteasome
EsiH04g0031790	ko00770:Pantothenate and CoA biosynthesis
EsiH05g0009840	ko03060:Protein export
EsiH05g0008450	ko03010:Ribosome
EsiH05g0007410	ko03010:Ribosome
EsiH05g0044470	ko03010:Ribosome
EsiH06g0010880	ko03013:RNA transport
EsiH06g0010860	ko03060:Protein export
EsiH06g0031480	ko00230:Purine metabolism;ko00240:Pyrimidine metabolism;ko03030:DNA replication;ko03410:Base excision repair;ko03420:Nucleotide excision repair;ko03430:Mismatch repair;ko03440:Homologous recombination
EsiS01g0028210	ko03040:Spliceosome
EsiS01g0027660	ko00500:Starch and sucrose metabolism
EsiS02g0055640	ko00940:Phenylpropanoid biosynthesis
EsiS02g0055630	ko00330:Arginine and proline metabolism
EsiS03g0031450	ko00190:Oxidative phosphorylation;ko04145:Phagosome
EsiS03g0031160	ko00030:Pentose phosphate pathway
EsiS07g0035140	ko00592:alpha-Linolenic acid metabolism
EsiS07g0035100	ko00240:Pyrimidine metabolism;ko00450:Selenocompound metabolism
EsiS07g0035060	ko00561:Glycerolipid metabolism
EsiS07g0035050	ko00010:Glycolysis / Gluconeogenesis;ko00030:Pentose phosphate pathway;ko00051:Fructose and mannose metabolism
EsiS07g0033950	ko04120:Ubiquitin mediated proteolysis
EsiS07g0046510	ko00500:Starch and sucrose metabolism
