# Supplementary material for: Genomic Dissection of Local Adaptation in Elymus sibiricus: Integrating SLAF Sequencing, Genetic Diversity, Genotype-Environment Association, and Common Garden Experiments
Source: Research Square preprint supplement (doi:10.21203/rs.3.rs-8447544/v1), 2026-01-28
Supplement: Supplementary file 3 [file 413fee5f25bc6374fd9fc06f.xlsx]

## Sheet: Sheet1
Genes NC vs XJ	KEGG pathway				Genes QTP vs NC	KEGG pathway			Genes XJ vs QTP	KEGG pathway		XJ vs NC	QTP vs NC	XJ vs QTP
EsiH01g0013190	ko00195:Photosynthesis				EsiH01g0035110	ko00564:Glycerophospholipid metabolism			EsiH01g0026920	ko00280:Valine, leucine and isoleucine degradation;ko00410:beta-Alanine metabolism;ko00640:Propanoate metabolism;ko01200:Carbon metabolism		2-Oxocarboxylic acid metabolism	AGE-RAGE signaling pathway in diabetic complications	Aminoacyl-tRNA biosynthesis
EsiH02g0030670	ko00510:N-Glycan biosynthesis				EsiH02g0039080	ko03015:mRNA surveillance pathway			EsiH01g0026280	ko00190:Oxidative phosphorylation		ABC transporters	alpha-Linolenic acid metabolism	Arginine and proline metabolism
EsiH02g0026020	ko00010:Glycolysis / Gluconeogenesis;ko00052:Galactose metabolism				EsiH02g0054880	ko00592:alpha-Linolenic acid metabolism			EsiH03g0041060	ko04712:Circadian rhythm - plant		ABC transporters	Circadian rhythm - plant	beta-Alanine metabolism
EsiH03g0019470	ko00195:Photosynthesis				EsiH03g0034900	ko03050:Proteasome;ko03440:Homologous recombination			EsiH06g0004600	ko00330:Arginine and proline metabolism;ko00410:beta-Alanine metabolism		Alanine, aspartate and glutamate metabolism	Endocytosis	beta-Alanine metabolism
EsiH03g0017380	ko02010:ABC transporters				EsiH04g0028690	ko04144:Endocytosis			EsiH07g0016500	ko00970:Aminoacyl-tRNA biosynthesis		Arginine and proline metabolism	Endocytosis	Carbon metabolism
EsiH03g0012740	ko03022:Basal transcription factors;ko03420:Nucleotide excision repair				EsiH04g0028680	ko03018:RNA degradation			EsiS01g0015790	ko04626:Plant-pathogen interaction		Arginine and proline metabolism	Ether lipid metabolism	Circadian rhythm - plant
EsiH03g0002860	ko00940:Phenylpropanoid biosynthesis				EsiH05g0034370	ko04626:Plant-pathogen interaction			EsiS01g0012380	ko00510:N-Glycan biosynthesis;ko04141:Protein processing in endoplasmic reticulum		Arginine biosynthesis	Glycerophospholipid metabolism	Linoleic acid metabolism
EsiH04g0032270	ko00270:Cysteine and methionine metabolism				EsiH05g0031990	ko03018:RNA degradation			EsiS02g0037630	ko04626:Plant-pathogen interaction		Basal transcription factors	Glycerophospholipid metabolism	N-Glycan biosynthesis
EsiH04g0041580	ko00195:Photosynthesis				EsiH05g0015160	ko03008:Ribosome biogenesis in eukaryotes;ko04712:Circadian rhythm - plant			EsiS02g0022530	ko03010:Ribosome		Basal transcription factors	Homologous recombination	Oxidative phosphorylation
EsiH04g0028690	ko04144:Endocytosis				EsiH05g0009900	ko00620:Pyruvate metabolism			EsiS03g0036450	ko03008:Ribosome biogenesis in eukaryotes		beta-Alanine metabolism	Inositol phosphate metabolism	Plant-pathogen interaction
EsiH04g0028680	ko03018:RNA degradation				EsiS01g0023200	ko00564:Glycerophospholipid metabolism;ko00565:Ether lipid metabolism;ko04144:Endocytosis			EsiS04g0039950	ko00591:Linoleic acid metabolism		beta-Alanine metabolism	Lysine degradation	Plant-pathogen interaction
EsiH05g0033450	ko00940:Phenylpropanoid biosynthesis				EsiS01g0015790	ko04626:Plant-pathogen interaction						Biosynthesis of amino acids	mRNA surveillance pathway	Propanoate metabolism
EsiH05g0019590	ko00906:Carotenoid biosynthesis				EsiS01g0014980	ko00940:Phenylpropanoid biosynthesis						Biosynthesis of amino acids	Phenylpropanoid biosynthesis	Protein processing in endoplasmic reticulum
EsiH05g0019570	ko04144:Endocytosis				EsiS01g0041390	ko00310:Lysine degradation						Biosynthesis of amino acids	Phosphatidylinositol signaling system	Ribosome
EsiH05g0017320	ko04075:Plant hormone signal transduction				EsiS03g0009300	ko00730:Thiamine metabolism						Biotin metabolism	Plant-pathogen interaction	Ribosome biogenesis in eukaryotes
EsiH05g0015160	ko03008:Ribosome biogenesis in eukaryotes;ko04712:Circadian rhythm - plant				EsiS05g0043490	ko00562:Inositol phosphate metabolism;ko04070:Phosphatidylinositol signaling system;ko04933:AGE-RAGE signaling pathway in diabetic complications						Carbon fixation in photosynthetic organisms	Plant-pathogen interaction	Valine, leucine and isoleucine degradation
EsiH05g0013920	ko03013:RNA transport				EsiS07g0032590	ko00860:Porphyrin and chlorophyll metabolism						Carbon metabolism	Porphyrin and chlorophyll metabolism
EsiH07g0035720	ko03022:Basal transcription factors;ko03420:Nucleotide excision repair											Carbon metabolism	Proteasome
EsiH07g0030500	ko00920:Sulfur metabolism											Carbon metabolism	Pyruvate metabolism
EsiH07g0015780	ko00400:Phenylalanine, tyrosine and tryptophan biosynthesis;ko01230:Biosynthesis of amino acids											Carbon metabolism	Ribosome biogenesis in eukaryotes
EsiH07g0009190	ko00010:Glycolysis / Gluconeogenesis;ko00030:Pentose phosphate pathway;ko00051:Fructose and mannose metabolism;ko00710:Carbon fixation in photosynthetic organisms;ko01200:Carbon metabolism											Carbon metabolism	RNA degradation
EsiH07g0038880	ko00770:Pantothenate and CoA biosynthesis											Carotenoid biosynthesis	RNA degradation
EsiS01g0025080	ko00280:Valine, leucine and isoleucine degradation;ko00410:beta-Alanine metabolism;ko00640:Propanoate metabolism;ko01200:Carbon metabolism											Circadian rhythm - plant	Thiamine metabolism
EsiS01g0025070	ko00500:Starch and sucrose metabolism											Citrate cycle (TCA cycle)
EsiS01g0005800	ko00030:Pentose phosphate pathway;ko01200:Carbon metabolism											Cutin, suberine and wax biosynthesis
EsiS02g0016090	ko03010:Ribosome											Cysteine and methionine metabolism
EsiS02g0012980	ko03010:Ribosome											Cysteine and methionine metabolism
EsiS02g0050910	ko04144:Endocytosis											Endocytosis
EsiS03g0035960	ko00020:Citrate cycle (TCA cycle)											Endocytosis
EsiS03g0034050	ko00940:Phenylpropanoid biosynthesis											Endocytosis
EsiS03g0024970	ko04626:Plant-pathogen interaction											Fatty acid biosynthesis
EsiS03g0023940	ko00561:Glycerolipid metabolism;ko00564:Glycerophospholipid metabolism;ko04070:Phosphatidylinositol signaling system											Fatty acid biosynthesis
EsiS03g0022110	ko00010:Glycolysis / Gluconeogenesis;ko00260:Glycine, serine and threonine metabolism;ko01200:Carbon metabolism;ko01230:Biosynthesis of amino acids											Fatty acid metabolism
EsiS05g0044350	ko00051:Fructose and mannose metabolism											Fatty acid metabolism
EsiS05g0028060	ko00330:Arginine and proline metabolism;ko00480:Glutathione metabolism											Fructose and mannose metabolism
EsiS05g0024100	ko00061:Fatty acid biosynthesis;ko00620:Pyruvate metabolism;ko00640:Propanoate metabolism;ko01212:Fatty acid metabolism											Fructose and mannose metabolism
EsiS05g0021530	ko00073:Cutin, suberine and wax biosynthesis;ko04146:Peroxisome											Galactose metabolism
EsiS05g0058640	ko00260:Glycine, serine and threonine metabolism;ko00350:Tyrosine metabolism;ko00360:Phenylalanine metabolism;ko00410:beta-Alanine metabolism;ko00950:Isoquinoline alkaloid biosynthesis;ko00960:Tropane, piperidine and pyridine alkaloid biosynthesis											Glutathione metabolism
EsiS06g0030240	ko00061:Fatty acid biosynthesis;ko00780:Biotin metabolism;ko01212:Fatty acid metabolism											Glycerolipid metabolism
EsiS06g0030230	ko00350:Tyrosine metabolism											Glycerophospholipid metabolism
EsiS06g0023200	ko00360:Phenylalanine metabolism;ko00940:Phenylpropanoid biosynthesis											Glycine, serine and threonine metabolism
EsiS06g0034800	ko02010:ABC transporters											Glycine, serine and threonine metabolism
EsiS06g0033840	ko00220:Arginine biosynthesis;ko00250:Alanine, aspartate and glutamate metabolism;ko00270:Cysteine and methionine metabolism;ko00330:Arginine and proline metabolism;ko00350:Tyrosine metabolism;ko00360:Phenylalanine metabolism;ko00400:Phenylalanine, tyrosine and tryptophan biosynthesis;ko00710:Carbon fixation in photosynthetic organisms;ko00950:Isoquinoline alkaloid biosynthesis;ko00960:Tropane, p…											Glycolysis / Gluconeogenesis
EsiS07g0026240	ko00511:Other glycan degradation;ko00600:Sphingolipid metabolism											Glycolysis / Gluconeogenesis
EsiS07g0026130	ko03040:Spliceosome											Glycolysis / Gluconeogenesis
EsiS07g0047100	ko00040:Pentose and glucuronate interconversions;ko00500:Starch and sucrose metabolism											Isoquinoline alkaloid biosynthesis
												Isoquinoline alkaloid biosynthesis
												N-Glycan biosynthesis
												Nucleotide excision repair
												Nucleotide excision repair
												Other glycan degradation
												Pantothenate and CoA biosynthesis
												Pentose and glucuronate interconversions
												Pentose phosphate pathway
												Pentose phosphate pathway
												Peroxisome
												Phenylalanine metabolism
												Phenylalanine metabolism
												Phenylalanine metabolism
												Phenylalanine, tyrosine and tryptophan biosynthesis
												Phenylalanine, tyrosine and tryptophan biosynthesis
												Phenylpropanoid biosynthesis
												Phenylpropanoid biosynthesis
												Phenylpropanoid biosynthesis
												Phenylpropanoid biosynthesis
												Phosphatidylinositol signaling system
												Photosynthesis
												Photosynthesis
												Photosynthesis
												Plant hormone signal transduction
												Plant-pathogen interaction
												Propanoate metabolism
												Propanoate metabolism
												Pyruvate metabolism
												Ribosome
												Ribosome
												Ribosome biogenesis in eukaryotes
												RNA degradation
												RNA transport
												Sphingolipid metabolism
												Spliceosome
												Starch and sucrose metabolism
												Starch and sucrose metabolism
												Sulfur metabolism
												Tropane, piperidine and pyridine alkaloid biosynthesis
												Tropane, piperidine and pyridine alkaloid biosynthesis
												Tyrosine metabolism
												Tyrosine metabolism
												Tyrosine metabolism
												Valine, leucine and isoleucine degradation
