# Supplementary material for: Genomic Dissection of Local Adaptation in Elymus sibiricus: Integrating SLAF Sequencing, Genetic Diversity, Genotype-Environment Association, and Common Garden Experiments
Source: Research Square preprint supplement (doi:10.21203/rs.3.rs-8447544/v1), 2026-01-28
Supplement: Supplementary file 4 [file 50803392abd9e82ede3cab7d.docx]

Fig S1. The density distribution of SLAF tags (A) and SNPs (B) within 14 chromosomes of *E. sibiricus*.

Fig S2. The estimation of optimal number of migration edges.

Fig S3. The pairwise correlation coefficients of 19 bioclimatic factors, longitude, latitude, and altitude for 318 wild accessions of *E. sibiricus*. *, *P* < 0.05; **, *P* < 0.01; ***, *P* < 0.001.

Fig S4. The selected regions and genes of XJ vs NC (A), QTP vs NC (B), and QTP vs XJ (C) regions identified by combined the Fst and Pi values.

Table S1. The basic information of the filtered data of each accession and each chromosome of *E. sibiricus*.

Table S2. The annotation results of genes associating with bio12 and showed differential expression in the drought transcriptome.

Table S3. The KEGG annotation results of candidate genes associated with temperature and precipitation factors.

Table S4. The KEGG annotation results of selected genes between NC vs XJ, QTP vs NC, and XJ vs QTP regions, respectively.

Table S5. The KEGG annotation of candidate genes associated with the biomass (BM).
