# Supplementary material for: Genomic Dissection of Local Adaptation in Elymus sibiricus: Integrating SLAF Sequencing, Genetic Diversity, Genotype-Environment Association, and Common Garden Experiments
Source: Research Square preprint supplement (doi:10.21203/rs.3.rs-8447544/v1), 2026-01-28
Supplement: Supplementary file 5 [file 86ec16bb9990d290518971b0.xlsx]

## Sheet: Sheet1
KEGG pathway	KEGG item	Gene number		KEGG pathway	KEGG item	Gene number
Pentose and glucuronate interconversions	Carbohydrate metabolism	2		SNARE interactions in vesicular transport	Cellular Processes	2
Pentose phosphate pathway	Carbohydrate metabolism	2		Photosynthesis	Energy Metabolism	2
Endocytosis	Cellular Processes	2		Plant-pathogen interaction	Environmental Information Processing	1
Peroxisome	Cellular Processes	2		Basal transcription factors	Genetic Information Processing	1
Regulation of autophagy	Cellular Processes	3		DNA replication	Genetic Information Processing	1
SNARE interactions in vesicular transport	Cellular Processes	1		Homologous recombination	Genetic Information Processing	1
Ubiquitin mediated proteolysis	Cellular Processes	8		Protein export	Genetic Information Processing	2
Oxidative phosphorylation	Energy Metabolism	3		Protein processing in endoplasmic reticulum	Genetic Information Processing	1
Photosynthesis	Energy Metabolism	5		Ribosome	Genetic Information Processing	3
Photosynthesis - antenna proteins	Energy Metabolism	1		Spliceosome	Genetic Information Processing	2
Plant-pathogen interaction	Environmental Information Processing	4		2-Oxocarboxylic acid metabolism	metabolism	1
Aminoacyl-tRNA biosynthesis	Genetic Information Processing	1		Alanine, aspartate and glutamate metabolism	metabolism	2
Basal transcription factors	Genetic Information Processing	3		Amino sugar and nucleotide sugar metabolism	metabolism	1
Base excision repair	Genetic Information Processing	3		Arginine biosynthesis	metabolism	2
Homologous recombination	Genetic Information Processing	3		Biosynthesis of amino acids	metabolism	5
mRNA surveillance pathway	Genetic Information Processing	3		Butanoate metabolism	metabolism	1
Nucleotide excision repair	Genetic Information Processing	1		Carbon fixation in photosynthetic organisms	metabolism	2
Protein export	Genetic Information Processing	2		Carbon metabolism	metabolism	3
Protein processing in endoplasmic reticulum	Genetic Information Processing	8		Ether lipid metabolism	metabolism	1
Ribosome	Genetic Information Processing	10		Flavone and flavonol biosynthesis	metabolism	2
Ribosome biogenesis in eukaryotes	Genetic Information Processing	1		Flavonoid biosynthesis	metabolism	2
RNA degradation	Genetic Information Processing	1		Galactose metabolism	metabolism	1
RNA polymerase	Genetic Information Processing	1		Glycerolipid metabolism	metabolism	1
RNA transport	Genetic Information Processing	4		Glycerophospholipid metabolism	metabolism	3
Spliceosome	Genetic Information Processing	4		Glycine, serine and threonine metabolism	metabolism	1
N-Glycan biosynthesis	Glycan biosynthesis and metabolism	2		Glycolysis / Gluconeogenesis	metabolism	2
2-Oxocarboxylic acid metabolism	Metabolism	2		Glyoxylate and dicarboxylate metabolism	metabolism	1
Alanine, aspartate and glutamate metabolism	Metabolism	1		Inositol phosphate metabolism	metabolism	1
alpha-Linolenic acid metabolism	Metabolism	1		Lysine biosynthesis	metabolism	1
Amino sugar and nucleotide sugar metabolism	Metabolism	2		Nitrogen metabolism	metabolism	1
Arginine and proline metabolism	Metabolism	4		Pentose phosphate pathway	metabolism	1
Arginine biosynthesis	Metabolism	4		Phenylalanine metabolism	metabolism	1
beta-Alanine metabolism	Metabolism	1		Phenylpropanoid biosynthesis	metabolism	6
Biosynthesis of amino acids	Metabolism	5		Purine metabolism	metabolism	3
C5-Branched dibasic acid metabolism	Metabolism	1		Pyrimidine metabolism	metabolism	1
Carbon fixation in photosynthetic organisms	Metabolism	2		Starch and sucrose metabolism	metabolism	1
Carbon metabolism	Metabolism	4		Terpenoid backbone biosynthesis	metabolism	1
Cyanoamino acid metabolism	Metabolism	2		Valine, leucine and isoleucine biosynthesis	metabolism	1
Cysteine and methionine metabolism	Metabolism	3		Zeatin biosynthesis	metabolism	1
Diterpenoid biosynthesis	Metabolism	1		Plant hormone signal transduction	Signal Transduction	1
Fatty acid elongation	Metabolism	2
Flavonoid biosynthesis	Metabolism	1
Folate biosynthesis	Metabolism	1
Fructose and mannose metabolism	Metabolism	1
Galactose metabolism	Metabolism	2
Glycine, serine and threonine metabolism	Metabolism	1
Glycosaminoglycan degradation	Metabolism	1
Glycosphingolipid biosynthesis - ganglio series	Metabolism	1
Glycosylphosphatidylinositol(GPI)-anchor biosynthesis	Metabolism	2
Isoquinoline alkaloid biosynthesis	Metabolism	2
Linoleic acid metabolism	Metabolism	1
One carbon pool by folate	Metabolism	1
Other glycan degradation	Metabolism	1
Phenylalanine metabolism	Metabolism	2
Phenylalanine, tyrosine and tryptophan biosynthesis	Metabolism	2
Phenylpropanoid biosynthesis	Metabolism	9
Porphyrin and chlorophyll metabolism	Metabolism	2
Purine metabolism	metabolism	2
Pyrimidine metabolism	metabolism	2
Starch and sucrose metabolism	metabolism	6
Stilbenoid, diarylheptanoid and gingerol biosynthesis	metabolism	1
Sulfur metabolism	metabolism	1
Sulfur relay system	metabolism	1
Terpenoid backbone biosynthesis	metabolism	2
Tropane, piperidine and pyridine alkaloid biosynthesis	metabolism	2
Tyrosine metabolism	metabolism	2
Valine, leucine and isoleucine biosynthesis	metabolism	1
Plant hormone signal transduction	Signal Transduction	7
Phagosome	Cellular Processes	3
