# Supplementary material for: Genomic Dissection of Local Adaptation in Elymus sibiricus: Integrating SLAF Sequencing, Genetic Diversity, Genotype-Environment Association, and Common Garden Experiments
Source: Research Square preprint supplement (doi:10.21203/rs.3.rs-8447544/v1), 2026-01-28
Supplement: Supplementary file 6 [file 95a0de8f87c03c157eb42d31.xlsx]

## Sheet: Sheet1
Specimens ID	Population	Location	Source	Deposition site	longitude	latitude	Total Reads	GC Percentage(%)	Q30 Percentage(%)	SLAF number	Average depth		Chromosome ID	SLAF number	Polymorphic SLAF
ES001	GS	China, Gansu Province	Collected	Sichuan Experimental Base of the Elymus Research Institute, Sichuan Agricultural University	102.014	35.0037	5467596	47.51	96.24	461808	9.279		H02	595300	251390
ES002	GS	China, Gansu Province	Collected	Sichuan Experimental Base of the Elymus Research Institute, Sichuan Agricultural University	102.034	35.0045	9726984	46.6	96.27	528428	12.8789		S02	621392	287530
ES003	GS	China, Gansu Province	Collected	Sichuan Experimental Base of the Elymus Research Institute, Sichuan Agricultural University	102.025	35.0037	9726984	48.9	95.89	645442	13.6764		H07	558619	224612
ES004	GS	China, Gansu Province	Collected	Sichuan Experimental Base of the Elymus Research Institute, Sichuan Agricultural University	102.054	35.0034	6373495	47.62	95.55	479505	12.1848		S07	570563	273155
ES005	GS	China, Gansu Province	Collected	Sichuan Experimental Base of the Elymus Research Institute, Sichuan Agricultural University	102.01	34.0094	7623625	49.6	95.99	372297	14.2376		H03	563783	243711
ES006	GS	China, Gansu Province	Collected	Sichuan Experimental Base of the Elymus Research Institute, Sichuan Agricultural University	102.011	34.0083	6839143	46.72	96.46	592342	10.5322		S03	552672	259482
ES007	GS	China, Gansu Province	Collected	Sichuan Experimental Base of the Elymus Research Institute, Sichuan Agricultural University	102.011	34.0016	7144242	49.01	96.29	525844	12.4123		H04	572348	244776
ES008	GS	China, Gansu Province	Collected	Sichuan Experimental Base of the Elymus Research Institute, Sichuan Agricultural University	103.003	34.0139	8574474	50.1	96.59	404574	14.2919		S04	469259	218644
ES009	GS	China, Gansu Province	Collected	Sichuan Experimental Base of the Elymus Research Institute, Sichuan Agricultural University	103.009	34.0095	8425246	49.77	96.57	595491	12.5528		H01	473314	197576
ES010	GS	China, Gansu Province	Collected	Sichuan Experimental Base of the Elymus Research Institute, Sichuan Agricultural University	103.009	34.009	6713701	48.01	96.5	495176	12.5557		S01	452759	213234
ES011	NC1	China, Hebei Province	Collected	Sichuan Experimental Base of the Elymus Research Institute, Sichuan Agricultural University	115.011	41.027	7707014	45.78	95.57	613017	13.7569		H06	488842	210685
ES012	NC1	China, Hebei Province	Collected	Sichuan Experimental Base of the Elymus Research Institute, Sichuan Agricultural University	115	41.0078	7707014	47.64	96.29	522531	13.628		S06	480902	229410
ES013	NC1	China, Hebei Province	Collected	Sichuan Experimental Base of the Elymus Research Institute, Sichuan Agricultural University	114.016	41.0078	5755051	47.71	96.03	449210	11.8936		S05	584987	270516
ES014	NC1	China, Hebei Province	Collected	Sichuan Experimental Base of the Elymus Research Institute, Sichuan Agricultural University	114.036	41.0068	6141284	47.64	95.51	552705	9.8577		H05	550511	235053
ES015	NC1	China, Hebei Province	Collected	Sichuan Experimental Base of the Elymus Research Institute, Sichuan Agricultural University	115	41.0092	8764139	49.41	95.75	534287	15.1605
ES016	NC1	China, Hebei Province	Collected	Sichuan Experimental Base of the Elymus Research Institute, Sichuan Agricultural University	115.001	41.0081	13144908	49.38	96.54	692313	17.2151
ES017	NC1	China, Hebei Province	Collected	Sichuan Experimental Base of the Elymus Research Institute, Sichuan Agricultural University	115.001	41.0089	11357325	47.08	96.21	572442	18.6615
ES018	NC1	China, Hebei Province	Collected	Sichuan Experimental Base of the Elymus Research Institute, Sichuan Agricultural University	115.006	41.0089	4753171	47.52	96.18	465550	9.5229
ES019	NC1	China, Hebei Province	Collected	Sichuan Experimental Base of the Elymus Research Institute, Sichuan Agricultural University	115.009	41.0086	7364546	49.04	96.24	411079	8.9204
ES020	NC1	China, Hebei Province	Collected	Sichuan Experimental Base of the Elymus Research Institute, Sichuan Agricultural University	115.01	41.0081	3078736	49.4	96.22	385892	7.4365
ES021	NC1	China, Hebei Province	Collected	Sichuan Experimental Base of the Elymus Research Institute, Sichuan Agricultural University	116	41.0092	2756624	49.54	95.66	370678	6.9172
ES022	NC1	China, Hebei Province	Collected	Sichuan Experimental Base of the Elymus Research Institute, Sichuan Agricultural University	115.021	41.01	4186379	49.32	95.85	467779	12.1669
ES023	NC1	China, Hebei Province	Collected	Sichuan Experimental Base of the Elymus Research Institute, Sichuan Agricultural University	115.015	41.0075	4186379	49.45	95.61	403021	9.6029
ES024	NC1	China, Hebei Province	Collected	Sichuan Experimental Base of the Elymus Research Institute, Sichuan Agricultural University	115.014	41.0064	6900407	48.64	96.42	532824	11.9873
ES025	NC1	China, Hebei Province	Collected	Sichuan Experimental Base of the Elymus Research Institute, Sichuan Agricultural University	115.014	41.0056	5150191	47.68	96.42	436194	10.9215
ES026	NC1	China, Hebei Province	Collected	Sichuan Experimental Base of the Elymus Research Institute, Sichuan Agricultural University	115.014	41.0053	3903928	48.65	95.8	455017	8.0091
ES027	NC1	China, Hebei Province	Collected	Sichuan Experimental Base of the Elymus Research Institute, Sichuan Agricultural University	115.012	41.0048	3245860	46.91	95.65	431342	6.8086
ES028	NC2	China, Inner Mongolia	Collected	Sichuan Experimental Base of the Elymus Research Institute, Sichuan Agricultural University	120.003	50.0042	4004307	47.86	95.8	382533	9.7422
ES029	NC2	China, Inner Mongolia	Collected	Sichuan Experimental Base of the Elymus Research Institute, Sichuan Agricultural University	120.015	50.0042	4579493	47.32	96.39	390938	11.0463
ES030	NC2	China, Inner Mongolia	Collected	Sichuan Experimental Base of the Elymus Research Institute, Sichuan Agricultural University	120.016	50.0089	7240614	49.09	95.87	500551	13.2556
ES031	NC2	China, Inner Mongolia	Collected	Sichuan Experimental Base of the Elymus Research Institute, Sichuan Agricultural University	121.022	50.0111	5155439	47.32	96.44	432311	11.1781
ES032	NC2	China, Inner Mongolia	Collected	Sichuan Experimental Base of the Elymus Research Institute, Sichuan Agricultural University	124.016	48.0108	6461580	46.42	96.13	551912	10.7707
ES033	NC2	China, Inner Mongolia	Collected	Sichuan Experimental Base of the Elymus Research Institute, Sichuan Agricultural University	124.003	48.0097	6520177	48.04	96.42	464845	13.1458
ES034	NC2	China, Inner Mongolia	Collected	Sichuan Experimental Base of the Elymus Research Institute, Sichuan Agricultural University	123.008	48.0019	9096254	47.94	96.04	590278	14.2004
ES035	NC2	China, Inner Mongolia	Collected	Sichuan Experimental Base of the Elymus Research Institute, Sichuan Agricultural University	123.008	48.0019	5720118	45.6	96.51	412766	13.0207
ES036	NC2	China, Inner Mongolia	Collected	Sichuan Experimental Base of the Elymus Research Institute, Sichuan Agricultural University	121.016	48.0119	4924488	48.1	96	539640	8.3166
ES037	NC2	China, Inner Mongolia	Collected	Sichuan Experimental Base of the Elymus Research Institute, Sichuan Agricultural University	121.005	49.0097	6580346	46.92	96.49	465979	13.2306
ES038	NC2	China, Inner Mongolia	Collected	Sichuan Experimental Base of the Elymus Research Institute, Sichuan Agricultural University	121.004	49.01	5044053	48.93	95.62	464124	9.9314
ES039	NC2	China, Inner Mongolia	Collected	Sichuan Experimental Base of the Elymus Research Institute, Sichuan Agricultural University	117.006	49.0103	2915738	48.17	96.48	376730	7.2042
ES040	NC2	China, Inner Mongolia	Collected	Sichuan Experimental Base of the Elymus Research Institute, Sichuan Agricultural University	117.011	49.0061	4568548	47.37	96.42	510105	8.3216
ES041	NC2	China, Inner Mongolia	Collected	Sichuan Experimental Base of the Elymus Research Institute, Sichuan Agricultural University	119.015	48.0025	6156493	49.02	96.55	467827	12.3297
ES042	NC2	China, Inner Mongolia	Collected	Sichuan Experimental Base of the Elymus Research Institute, Sichuan Agricultural University	119.016	48.0008	4385647	47.65	96.01	472387	8.6312
ES043	NC2	China, Inner Mongolia	Collected	Sichuan Experimental Base of the Elymus Research Institute, Sichuan Agricultural University	119.016	48.0008	4557682	47.2	96.12	437544	9.7289
ES044	NC2	China, Inner Mongolia	Collected	Sichuan Experimental Base of the Elymus Research Institute, Sichuan Agricultural University	119.008	47.0069	5993422	48.57	96.07	563410	9.6006
ES045	NC2	China, Inner Mongolia	Collected	Sichuan Experimental Base of the Elymus Research Institute, Sichuan Agricultural University	119.016	46.0164	5123728	46.48	96.24	548870	8.4816
ES046	NC2	China, Inner Mongolia	Collected	Sichuan Experimental Base of the Elymus Research Institute, Sichuan Agricultural University	120.013	46.005	5872538	47.37	96.5	515413	10.5208
ES047	NC1	China, Inner Mongolia	Collected	Sichuan Experimental Base of the Elymus Research Institute, Sichuan Agricultural University	118.01	44.0039	4571213	48.38	95.45	422288	9.9543
ES048	NC1	China, Inner Mongolia	Collected	Sichuan Experimental Base of the Elymus Research Institute, Sichuan Agricultural University	118.012	44.0036	6546631	47.87	96.44	526354	11.4696
ES049	NC1	China, Inner Mongolia	Collected	Sichuan Experimental Base of the Elymus Research Institute, Sichuan Agricultural University	118.008	44.0067	5901126	48.64	96.28	467102	11.8099
ES050	NC1	China, Inner Mongolia	Collected	Sichuan Experimental Base of the Elymus Research Institute, Sichuan Agricultural University	116.008	44.0028	6435091	46.95	95.85	458796	13.1961
ES051	NC1	China, Inner Mongolia	Collected	Sichuan Experimental Base of the Elymus Research Institute, Sichuan Agricultural University	116.002	43.0044	9133491	47.75	95.79	640174	12.9513
ES052	NC1	China, Inner Mongolia	Collected	Sichuan Experimental Base of the Elymus Research Institute, Sichuan Agricultural University	115.016	42.0108	4744194	47.11	96.28	448536	9.8766
ES053	NC1	China, Inner Mongolia	Collected	Sichuan Experimental Base of the Elymus Research Institute, Sichuan Agricultural University	116.006	42.0033	9275172	47.06	96.26	558869	15.3621
ES054	NC1	China, Inner Mongolia	Collected	Sichuan Experimental Base of the Elymus Research Institute, Sichuan Agricultural University	116.011	42	6849455	46.17	95.61	448006	14.3374
ES055	NC1	China, Inner Mongolia	Collected	Sichuan Experimental Base of the Elymus Research Institute, Sichuan Agricultural University	116.012	42	7506797	46.74	95.71	521581	13.2594
ES056	NC1	China, Inner Mongolia	Collected	Sichuan Experimental Base of the Elymus Research Institute, Sichuan Agricultural University	117.01	43.0092	4623556	47.49	95.9	422382	10.1253
ES057	NC1	China, Inner Mongolia	Collected	Sichuan Experimental Base of the Elymus Research Institute, Sichuan Agricultural University	117.007	43.0103	3666273	48.26	95.7	399105	8.39
ES058	NC1	China, Inner Mongolia	Collected	Sichuan Experimental Base of the Elymus Research Institute, Sichuan Agricultural University	111.013	41.0006	4545267	47.03	96.08	419658	9.996
ES059	NC1	China, Inner Mongolia	Collected	Sichuan Experimental Base of the Elymus Research Institute, Sichuan Agricultural University	111.012	41.0042	4490238	46.34	96.21	453870	9.0786
ES060	NC1	China, Inner Mongolia	Collected	Sichuan Experimental Base of the Elymus Research Institute, Sichuan Agricultural University	111.011	41.0036	6787686	48.76	95.69	560804	10.6332
ES061	NC1	China, Inner Mongolia	Collected	Sichuan Experimental Base of the Elymus Research Institute, Sichuan Agricultural University	111.013	41.0011	3499233	48	95.8	386340	8.2718
ES062	NC1	China, Inner Mongolia	Collected	Sichuan Experimental Base of the Elymus Research Institute, Sichuan Agricultural University	111.014	40.0158	6184706	48.59	95.51	488775	11.4555
ES063	QH	China, Qinghai Province	Collected	Sichuan Experimental Base of the Elymus Research Institute, Sichuan Agricultural University	101.016	36.0072	7472271	47.79	96.4	506981	13.6064
ES064	QH	China, Qinghai Province	Collected	Sichuan Experimental Base of the Elymus Research Institute, Sichuan Agricultural University	101.014	35.0036	8118730	48.36	96.59	532582	14.1093
ES065	QH	China, Qinghai Province	Collected	Sichuan Experimental Base of the Elymus Research Institute, Sichuan Agricultural University	101.014	35.0033	7472271	45.5	95.95	497601	15.699
ES066	QH	China, Qinghai Province	Collected	Sichuan Experimental Base of the Elymus Research Institute, Sichuan Agricultural University	100.014	35.0036	6498283	48.51	95.58	321239	13.86
ES067	SC	China, Sichuan Province	Collected	Sichuan Experimental Base of the Elymus Research Institute, Sichuan Agricultural University	102.62	31.98	5549097	47.19	96.27	508790	9.8751
ES068	SC	China, Sichuan Province	Collected	Sichuan Experimental Base of the Elymus Research Institute, Sichuan Agricultural University	102.62	31.98	4840540	46.62	96.43	604444	7.1447
ES069	SC	China, Sichuan Province	Collected	Sichuan Experimental Base of the Elymus Research Institute, Sichuan Agricultural University	102.646	34.118	4989207	47.8	95.72	608186	7.0211
ES070	SC	China, Sichuan Province	Collected	Sichuan Experimental Base of the Elymus Research Institute, Sichuan Agricultural University	103.255	33.644	5599381	46.38	96.38	481481	10.6014
ES071	SC	China, Sichuan Province	Collected	Sichuan Experimental Base of the Elymus Research Institute, Sichuan Agricultural University	103.354	33.6126	7005868	47.29	96.66	916833	6.1343
ES072	SC	China, Sichuan Province	Collected	Sichuan Experimental Base of the Elymus Research Institute, Sichuan Agricultural University	103.337	33.6547	5039774	46.79	96.08	484856	9.3356
ES073	SC	China, Sichuan Province	Collected	Sichuan Experimental Base of the Elymus Research Institute, Sichuan Agricultural University	103.269	33.6711	6876167	47.09	95.85	653793	8.9134
ES074	SC	China, Sichuan Province	Collected	Sichuan Experimental Base of the Elymus Research Institute, Sichuan Agricultural University	103.269	33.6744	6036192	47.3	96.23	571570	9.1715
ES075	SC	China, Sichuan Province	Collected	Sichuan Experimental Base of the Elymus Research Institute, Sichuan Agricultural University	102.088	32.7354	5048472	45.49	96.18	409486	11.4198
ES076	SC	China, Sichuan Province	Collected	Sichuan Experimental Base of the Elymus Research Institute, Sichuan Agricultural University	102.056	32.761	8535599	48.18	95.57	803184	9.1981
ES077	SC	China, Sichuan Province	Collected	Sichuan Experimental Base of the Elymus Research Institute, Sichuan Agricultural University	101.56	32.6152	9656475	47.47	95.55	671775	12.7843
ES078	SC	China, Sichuan Province	Collected	Sichuan Experimental Base of the Elymus Research Institute, Sichuan Agricultural University	101.183	32.679	5551336	47.03	95.87	499379	9.3273
ES079	SC	China, Sichuan Province	Collected	Sichuan Experimental Base of the Elymus Research Institute, Sichuan Agricultural University	101.186	32.617	5551336	46.8	95.39	573434	8.7652
ES080	SC	China, Sichuan Province	Collected	Sichuan Experimental Base of the Elymus Research Institute, Sichuan Agricultural University	100.953	32.666	15310111	48.43	95	569644	10.5738
ES081	SC	China, Sichuan Province	Collected	Sichuan Experimental Base of the Elymus Research Institute, Sichuan Agricultural University	100.985	32.213	15310111	46.93	96.21	854968	16.0515
ES082	XJ	China, Xinjiang	Collected	Sichuan Experimental Base of the Elymus Research Institute, Sichuan Agricultural University	81.0011	43.0061	12273596	46.64	95.76	585175	19.5408
ES083	XJ	China, Xinjiang	Collected	Sichuan Experimental Base of the Elymus Research Institute, Sichuan Agricultural University	81.0019	43.0036	19792985	46.82	96.08	707522	26.112
ES084	XJ	China, Xinjiang	Collected	Sichuan Experimental Base of the Elymus Research Institute, Sichuan Agricultural University	81.0014	43.0022	5409639	47.53	95.87	468941	10.7501
ES085	XJ	China, Xinjiang	Collected	Sichuan Experimental Base of the Elymus Research Institute, Sichuan Agricultural University	81.0006	43.0017	8487738	48.05	95.63	530399	14.7526
ES086	XJ	China, Xinjiang	Collected	Sichuan Experimental Base of the Elymus Research Institute, Sichuan Agricultural University	89.0125	47.0019	7216802	47.93	95.94	535758	12.4984
ES087	XJ	China, Xinjiang	Collected	Sichuan Experimental Base of the Elymus Research Institute, Sichuan Agricultural University	89.0125	47.0022	9115575	46.69	95.92	514454	16.6569
ES088	XJ	China, Xinjiang	Collected	Sichuan Experimental Base of the Elymus Research Institute, Sichuan Agricultural University	89.0199	47.0028	6553732	47.64	95.8	476061	12.7506
ES089	XJ	China, Xinjiang	Collected	Sichuan Experimental Base of the Elymus Research Institute, Sichuan Agricultural University	89.0128	47.0022	11131756	48.89	94.91	627014	16.0028
ES090	XJ	China, Xinjiang	Collected	Sichuan Experimental Base of the Elymus Research Institute, Sichuan Agricultural University	89.0149	47.0027	13938610	46.68	96.13	559695	23.1896
ES091	XJ	China, Xinjiang	Collected	Sichuan Experimental Base of the Elymus Research Institute, Sichuan Agricultural University	89.0201	47.0046	7710049	45.49	95.87	510251	13.8297
ES092	XJ	China, Xinjiang	Collected	Sichuan Experimental Base of the Elymus Research Institute, Sichuan Agricultural University	89.0123	47.0028	6299365	46.86	95.98	476211	12.2065
ES093	XJ	China, Xinjiang	Collected	Sichuan Experimental Base of the Elymus Research Institute, Sichuan Agricultural University	90.0045	46.0082	5029312	47	95.69	476006	11.4418
ES094	XJ	China, Xinjiang	Collected	Sichuan Experimental Base of the Elymus Research Institute, Sichuan Agricultural University	90.0044	46.0089	5029312	45.89	95.93	463453	10.0411
ES095	XJ	China, Xinjiang	Collected	Sichuan Experimental Base of the Elymus Research Institute, Sichuan Agricultural University	90.005	46.0092	8454194	48.07	95.52	524914	14.6861
ES096	XJ	China, Xinjiang	Collected	Sichuan Experimental Base of the Elymus Research Institute, Sichuan Agricultural University	89.0106	43.0114	9037324	47.52	96.5	483590	17.4532
ES097	XJ	China, Xinjiang	Collected	Sichuan Experimental Base of the Elymus Research Institute, Sichuan Agricultural University	89.0103	43.0113	11192338	47.41	96.53	489712	21.4611
ES098	XJ	China, Xinjiang	Collected	Sichuan Experimental Base of the Elymus Research Institute, Sichuan Agricultural University	89.0108	43.0102	6371030	46.59	95.9	441982	13.4572
ES099	XJ	China, Xinjiang	Collected	Sichuan Experimental Base of the Elymus Research Institute, Sichuan Agricultural University	89.0036	43.0133	5303412	45.38	95.1	503286	9.3335
ES100	XJ	China, Xinjiang	Collected	Sichuan Experimental Base of the Elymus Research Institute, Sichuan Agricultural University	87.005	43.0094	10066213	46.85	96.09	597686	15.6096
ES101	XJ	China, Xinjiang	Collected	Sichuan Experimental Base of the Elymus Research Institute, Sichuan Agricultural University	87.0045	43.0097	6800209	46.25	95.85	484906	12.9033
ES102	XJ	China, Xinjiang	Collected	Sichuan Experimental Base of the Elymus Research Institute, Sichuan Agricultural University	87.0028	43.0086	4792434	47.88	95.78	394658	10.3976
ES103	XJ	China, Xinjiang	Collected	Sichuan Experimental Base of the Elymus Research Institute, Sichuan Agricultural University	87.0028	43.0086	4792434	46.44	95.66	438532	10.2128
ES104	XJ	China, Xinjiang	Collected	Sichuan Experimental Base of the Elymus Research Institute, Sichuan Agricultural University	87.0025	43.0084	4792434	48.28	95.72	455139	9.4102
ES105	XJ	China, Xinjiang	Collected	Sichuan Experimental Base of the Elymus Research Institute, Sichuan Agricultural University	87.0028	43.0086	4792434	45.85	95.94	469107	12.8728
ES106	XJ	China, Xinjiang	Collected	Sichuan Experimental Base of the Elymus Research Institute, Sichuan Agricultural University	87.0028	43.0086	4792434	47.43	95.24	430660	10.5062
ES107	XJ	China, Xinjiang	Collected	Sichuan Experimental Base of the Elymus Research Institute, Sichuan Agricultural University	87.0028	43.0075	4792434	46.9	95.96	520410	13.8244
ES108	XJ	China, Xinjiang	Collected	Sichuan Experimental Base of the Elymus Research Institute, Sichuan Agricultural University	87.0046	43.0177	4792434	47.54	95.77	441276	10.2078
ES109	XZ	China, Xizang	Collected	Sichuan Experimental Base of the Elymus Research Institute, Sichuan Agricultural University	98.0118	29.013	4792434	47.54	95.53	499119	9.452
ES110	XZ	China, Xizang	Collected	Sichuan Experimental Base of the Elymus Research Institute, Sichuan Agricultural University	97.0114	29.0142	4792434	45.54	95.38	452926	7.0535
ES111	XZ	China, Xizang	Collected	Sichuan Experimental Base of the Elymus Research Institute, Sichuan Agricultural University	96.0144	29.0178	5393991	46.38	96.46	617821	5.1416
ES112	XZ	China, Xizang	Collected	Sichuan Experimental Base of the Elymus Research Institute, Sichuan Agricultural University	92.0133	29.0146	6287392	45.86	95.9	442707	9.5288
ES113	XZ	China, Xizang	Collected	Sichuan Experimental Base of the Elymus Research Institute, Sichuan Agricultural University	90.0136	29.0122	8433308	46.57	95.87	382395	10.4517
ES114	XZ	China, Xizang	Collected	Sichuan Experimental Base of the Elymus Research Institute, Sichuan Agricultural University	93.0122	31.0128	5081218	48.06	95.74	488538	13.2177
ES115	XZ	China, Xizang	Collected	Sichuan Experimental Base of the Elymus Research Institute, Sichuan Agricultural University	95.0006	31.0114	5081218	45.39	96.69	448196	15.2857
ES116	XZ	China, Xizang	Collected	Sichuan Experimental Base of the Elymus Research Institute, Sichuan Agricultural University	95.0006	31.0114	5081218	45.74	95.5	476828	12.5679
ES117	XZ	China, Xizang	Collected	Sichuan Experimental Base of the Elymus Research Institute, Sichuan Agricultural University	96.0015	31.0033	5081218	45.84	93.41	412058	14.1785
ES118	XZ	China, Xizang	Collected	Sichuan Experimental Base of the Elymus Research Institute, Sichuan Agricultural University	97.0158	31.0054	13497468	47.49	95.82	373545	11.7502
ES119	XZ	China, Xizang	Collected	Sichuan Experimental Base of the Elymus Research Institute, Sichuan Agricultural University	98.0022	31.0061	13497468	47.6	94.93	386750	9.7849
ES120	XZ	China, Xizang	Collected	Sichuan Experimental Base of the Elymus Research Institute, Sichuan Agricultural University	98.0028	31.0067	13497468	46.83	96.29	487300	13.6029
ES121	NA2	Russia	Obtained form the National Plant Germplasm System (NGPS)	Sichuan Experimental Base of the Elymus Research Institute, Sichuan Agricultural University	112.169	54.6369	6761501	46.63	96.79	669435	17.5737
ES122	NA3	Russia	Obtained form the National Plant Germplasm System (NGPS)	Sichuan Experimental Base of the Elymus Research Institute, Sichuan Agricultural University	126.777	54.0349	6761501	48.04	95.15	619244	11.1063
ES123	NA2	Russia	Obtained form the National Plant Germplasm System (NGPS)	Sichuan Experimental Base of the Elymus Research Institute, Sichuan Agricultural University	113.554	52.0733	6592885	48.97	95.68	473504	13.475
ES124	MGL	Mongolia	Obtained form the National Plant Germplasm System (NGPS)	Sichuan Experimental Base of the Elymus Research Institute, Sichuan Agricultural University	105.672	49.9606	7293529	48.98	95.62	512805	13.5469
ES125	MGL	Mongolia	Obtained form the National Plant Germplasm System (NGPS)	Sichuan Experimental Base of the Elymus Research Institute, Sichuan Agricultural University	106.442	47.4072	7293529	48.66	95.71	536259	10.3324
ES126	NA1	Russia	Obtained form the National Plant Germplasm System (NGPS)	Sichuan Experimental Base of the Elymus Research Institute, Sichuan Agricultural University	81.5789	52.7071	11423677	48.29	96.25	489336	12.6516
ES127	GS	China, Gansu Province	Collected	Sichuan Experimental Base of the Elymus Research Institute, Sichuan Agricultural University	102.014	35.0337	5467596	47.94	95.47	448399	11.2974
ES128	GS	China, Gansu Province	Collected	Sichuan Experimental Base of the Elymus Research Institute, Sichuan Agricultural University	102.013	35.0034	9726984	49.33	95.49	431972	9.4313
ES129	GS	China, Gansu Province	Collected	Sichuan Experimental Base of the Elymus Research Institute, Sichuan Agricultural University	103.01	34.007	6713701	47.25	95.9	461264	11.5768
ES130	NC1	China, Hebei Province	Collected	Sichuan Experimental Base of the Elymus Research Institute, Sichuan Agricultural University	115.011	41.0081	7364546	49.71	95.45	472861	12.633
ES131	NC1	China, Hebei Province	Collected	Sichuan Experimental Base of the Elymus Research Institute, Sichuan Agricultural University	115.015	41.0059	3245860	47.62	96.31	456724	11.5893
ES132	NC2	China, Inner Mongolia	Collected	Sichuan Experimental Base of the Elymus Research Institute, Sichuan Agricultural University	120.016	50.0088	7240614	47.45	95.69	447226	11.2838
ES133	NC2	China, Inner Mongolia	Collected	Sichuan Experimental Base of the Elymus Research Institute, Sichuan Agricultural University	121.01	50.0108	7240614	48.02	96.05	587256	14.5719
ES134	NC2	China, Inner Mongolia	Collected	Sichuan Experimental Base of the Elymus Research Institute, Sichuan Agricultural University	124.016	49.0086	5155439	46.58	96.31	448314	14.4167
ES135	NC2	China, Inner Mongolia	Collected	Sichuan Experimental Base of the Elymus Research Institute, Sichuan Agricultural University	124.009	48.0078	6461580	48.26	95.86	549239	15.6596
ES136	NC2	China, Inner Mongolia	Collected	Sichuan Experimental Base of the Elymus Research Institute, Sichuan Agricultural University	122.013	47.0156	5720118	48.2	96.57	482105	8.6683
ES137	NC2	China, Inner Mongolia	Collected	Sichuan Experimental Base of the Elymus Research Institute, Sichuan Agricultural University	119.016	47.0019	5993422	48.16	96.15	567649	14.7244
ES138	NC1	China, Inner Mongolia	Collected	Sichuan Experimental Base of the Elymus Research Institute, Sichuan Agricultural University	118.009	43.0161	5872538	47.85	96.44	480870	9.3965
ES139	NC1	China, Inner Mongolia	Collected	Sichuan Experimental Base of the Elymus Research Institute, Sichuan Agricultural University	116.014	43.0108	6435091	48.97	96.36	578087	12.4362
ES140	NC1	China, Inner Mongolia	Collected	Sichuan Experimental Base of the Elymus Research Institute, Sichuan Agricultural University	117.004	42.0078	6474108	49.25	96.39	452111	11.2165
ES141	NC1	China, Inner Mongolia	Collected	Sichuan Experimental Base of the Elymus Research Institute, Sichuan Agricultural University	117.007	42.0106	6474108	47.32	96.01	461988	11.3653
ES142	QH	China, Qinghai Province	Collected	Sichuan Experimental Base of the Elymus Research Institute, Sichuan Agricultural University	102.001	36.0036	6184706	48.16	95.92	470024	9.2696
ES143	QH	China, Qinghai Province	Collected	Sichuan Experimental Base of the Elymus Research Institute, Sichuan Agricultural University	101.016	36.0077	7472271	47.62	96.42	346726	7.8433
ES144	QH	China, Qinghai Province	Collected	Sichuan Experimental Base of the Elymus Research Institute, Sichuan Agricultural University	98.0164	37.0044	6693711	48.69	96.21	307562	10.2989
ES145	SC	China, Sichuan Province	Collected	Sichuan Experimental Base of the Elymus Research Institute, Sichuan Agricultural University	101.97	32.381	4840540	47.42	94.62	415392	6.6543
ES146	SC	China, Sichuan Province	Collected	Sichuan Experimental Base of the Elymus Research Institute, Sichuan Agricultural University	103.228	33.584	4941775	48.53	95.58	524192	11.9966
ES147	SC	China, Sichuan Province	Collected	Sichuan Experimental Base of the Elymus Research Institute, Sichuan Agricultural University	102.652	34.123	4989207	49.38	95.54	469715	12.2503
ES148	SC	China, Sichuan Province	Collected	Sichuan Experimental Base of the Elymus Research Institute, Sichuan Agricultural University	103.248	33.641	4989207	49.16	95.8	463644	8.476
ES149	SC	China, Sichuan Province	Collected	Sichuan Experimental Base of the Elymus Research Institute, Sichuan Agricultural University	103.355	33.6124	5599381	46.97	95.84	482488	11.7383
ES150	SC	China, Sichuan Province	Collected	Sichuan Experimental Base of the Elymus Research Institute, Sichuan Agricultural University	102.079	32.7456	5048472	46.72	94.98	485924	10.6188
ES151	SC	China, Sichuan Province	Collected	Sichuan Experimental Base of the Elymus Research Institute, Sichuan Agricultural University	102.055	32.7655	8535599	49.09	95.52	425181	10.1647
ES152	SC	China, Sichuan Province	Collected	Sichuan Experimental Base of the Elymus Research Institute, Sichuan Agricultural University	100.714	31.8703	15310111	49.67	95.48	416979	9.5582
ES153	SC	China, Sichuan Province	Collected	Sichuan Experimental Base of the Elymus Research Institute, Sichuan Agricultural University	100.298	30.3169	15310111	47.93	95.34	592161	11.3515
ES154	SC	China, Sichuan Province	Collected	Sichuan Experimental Base of the Elymus Research Institute, Sichuan Agricultural University	100.347	29.8301	17920752	46.87	95.64	531180	16.357
ES155	XJ	China, Xinjiang	Collected	Sichuan Experimental Base of the Elymus Research Institute, Sichuan Agricultural University	81.0013	43.0068	17920752	47.3	96.37	494893	17.9002
ES156	XJ	China, Xinjiang	Collected	Sichuan Experimental Base of the Elymus Research Institute, Sichuan Agricultural University	81.0019	43.0036	12273596	46.78	95.22	540048	13.064
ES157	XJ	China, Xinjiang	Collected	Sichuan Experimental Base of the Elymus Research Institute, Sichuan Agricultural University	89.0128	47.0025	13938610	48.39	95.9	499048	14.0388
ES158	XJ	China, Xinjiang	Collected	Sichuan Experimental Base of the Elymus Research Institute, Sichuan Agricultural University	89.0127	47.0023	6299365	49	94.83	500776	10.9429
ES159	XJ	China, Xinjiang	Collected	Sichuan Experimental Base of the Elymus Research Institute, Sichuan Agricultural University	90.004	46.0082	5029312	48.43	95.87	696475	15.0109
ES160	XJ	China, Xinjiang	Collected	Sichuan Experimental Base of the Elymus Research Institute, Sichuan Agricultural University	89.0033	43.0128	6371030	47.36	96.03	587539	12.6766
ES161	XJ	China, Xinjiang	Collected	Sichuan Experimental Base of the Elymus Research Institute, Sichuan Agricultural University	89.0031	43.0156	6371030	47.56	95.67	474882	15.0058
ES162	XJ	China, Xinjiang	Collected	Sichuan Experimental Base of the Elymus Research Institute, Sichuan Agricultural University	89.0039	43.0117	6371030	48.03	95.22	473005	10.1864
ES163	XJ	China, Xinjiang	Collected	Sichuan Experimental Base of the Elymus Research Institute, Sichuan Agricultural University	87.0046	43.0095	4792434	48.73	94.88	456620	9.5326
ES164	XZ	China, Xizang	Collected	Sichuan Experimental Base of the Elymus Research Institute, Sichuan Agricultural University	96.0111	29.0164	5393991	47.62	96.49	497450	9.978
ES165	XZ	China, Xizang	Collected	Sichuan Experimental Base of the Elymus Research Institute, Sichuan Agricultural University	92.0117	29.0144	6287392	46.15	94.77	433806	13.255
ES166	XZ	China, Xizang	Collected	Sichuan Experimental Base of the Elymus Research Institute, Sichuan Agricultural University	92.0156	30.0003	10056735	49.03	95.48	548994	16.5592
ES167	XZ	China, Xizang	Collected	Sichuan Experimental Base of the Elymus Research Institute, Sichuan Agricultural University	91.015	29.0122	8433308	48.26	96.5	574449	13.367
ES168	XZ	China, Xizang	Collected	Sichuan Experimental Base of the Elymus Research Institute, Sichuan Agricultural University	90.0155	29.0163	8058569	48.42	94.88	553141	13.3108
ES169	XZ	China, Xizang	Collected	Sichuan Experimental Base of the Elymus Research Institute, Sichuan Agricultural University	92.0122	31.0125	8661200	48.67	95.65	399029	15.1931
ES170	XZ	China, Xizang	Collected	Sichuan Experimental Base of the Elymus Research Institute, Sichuan Agricultural University	97.0039	31.0078	10116411	47.48	96.2	490926	19.1845
ES171	XZ	China, Xizang	Collected	Sichuan Experimental Base of the Elymus Research Institute, Sichuan Agricultural University	97.0156	31.0053	13497468	45.66	96.66	507254	24.566
ES172	EU	Belgium	Obtained form the National Plant Germplasm System (NGPS)	Sichuan Experimental Base of the Elymus Research Institute, Sichuan Agricultural University	4.46994	50.5039	6105247	45.97	96.48	533197	20.3284
ES173	NA2	Russia	Obtained form the National Plant Germplasm System (NGPS)	Sichuan Experimental Base of the Elymus Research Institute, Sichuan Agricultural University	109.954	54.0156	6761501	49.84	95.61	468089	13.3378
ES174	NA2	Russia	Obtained form the National Plant Germplasm System (NGPS)	Sichuan Experimental Base of the Elymus Research Institute, Sichuan Agricultural University	111.021	53.3384	6592885	47.35	95.86	451088	13.5111
ES175	NA3	Russia	Obtained form the National Plant Germplasm System (NGPS)	Sichuan Experimental Base of the Elymus Research Institute, Sichuan Agricultural University	126.217	54.3931	6105247	47.55	95.86	440020	12.8901
ES176	NA3	Russia	Obtained form the National Plant Germplasm System (NGPS)	Sichuan Experimental Base of the Elymus Research Institute, Sichuan Agricultural University	125.445	54.6926	7293529	48.53	95.9	328428	14.5125
ES177	MGL	Mongolia	Obtained form the National Plant Germplasm System (NGPS)	Sichuan Experimental Base of the Elymus Research Institute, Sichuan Agricultural University	104.884	49.3711	8140300	49.58	95.53	513262	14.7447
ES178	MGL	Mongolia	Obtained form the National Plant Germplasm System (NGPS)	Sichuan Experimental Base of the Elymus Research Institute, Sichuan Agricultural University	99.8339	50.2961	11423677	48.9	95.91	604373	17.4597
ES179	NA1	Russia	Obtained form the National Plant Germplasm System (NGPS)	Sichuan Experimental Base of the Elymus Research Institute, Sichuan Agricultural University	81.5973	52.156	6539305	49.26	95.53	510055	11.7003
ES180	CA	Armenia	Obtained form the National Plant Germplasm System (NGPS)	Sichuan Experimental Base of the Elymus Research Institute, Sichuan Agricultural University	39.7251	45.5204	3742058	48.91	95.26	376191	9.1428
ES181	NA3	Russia	Obtained form the National Plant Germplasm System (NGPS)	Sichuan Experimental Base of the Elymus Research Institute, Sichuan Agricultural University	124.04	53.87	4489040	46.54	96.05	362570	11.6541
ES182	XZ	China, Xizang	Collected	Sichuan Experimental Base of the Elymus Research Institute, Sichuan Agricultural University	98.0119	29.0122	9765482	46.4	93.92	575502	15.9448
ES183	XZ	China, Xizang	Collected	Sichuan Experimental Base of the Elymus Research Institute, Sichuan Agricultural University	98.012	29.013	6316166	46.97	94.19	560774	10.1476
ES184	XZ	China, Xizang	Collected	Sichuan Experimental Base of the Elymus Research Institute, Sichuan Agricultural University	98.0153	29.0149	8321251	45.81	94.22	461900	17.0472
ES185	XZ	China, Xizang	Collected	Sichuan Experimental Base of the Elymus Research Institute, Sichuan Agricultural University	98.0134	29.0137	3223026	44.77	94.07	310722	9.8484
ES186	XZ	China, Xizang	Collected	Sichuan Experimental Base of the Elymus Research Institute, Sichuan Agricultural University	98.01	29.0101	3249969	45.32	93.51	344115	8.9063
ES187	XZ	China, Xizang	Collected	Sichuan Experimental Base of the Elymus Research Institute, Sichuan Agricultural University	98.011	29.0124	2265223	45.74	94.4	308062	6.9318
ES188	XZ	China, Xizang	Collected	Sichuan Experimental Base of the Elymus Research Institute, Sichuan Agricultural University	96.0165	29.0179	17233022	45.23	94.54	618653	26.1567
ES189	XZ	China, Xizang	Collected	Sichuan Experimental Base of the Elymus Research Institute, Sichuan Agricultural University	96.02	29.0144	8604338	45.84	93.98	551772	14.6296
ES190	XZ	China, Xizang	Collected	Sichuan Experimental Base of the Elymus Research Institute, Sichuan Agricultural University	96.02	29.0112	11863056	45.69	94.26	514630	21.742
ES191	XZ	China, Xizang	Collected	Sichuan Experimental Base of the Elymus Research Institute, Sichuan Agricultural University	96.0177	29.0142	8494038	46.14	93.87	532444	14.9508
ES192	XZ	China, Xizang	Collected	Sichuan Experimental Base of the Elymus Research Institute, Sichuan Agricultural University	96.0134	29.0123	3894534	45.75	93.51	381827	9.6362
ES193	XZ	China, Xizang	Collected	Sichuan Experimental Base of the Elymus Research Institute, Sichuan Agricultural University	96.0178	29.016	7242854	45.41	93.93	590591	11.2351
ES194	XZ	China, Xizang	Collected	Sichuan Experimental Base of the Elymus Research Institute, Sichuan Agricultural University	96.0128	29.0089	14135056	45.09	93.64	584154	22.6877
ES195	XZ	China, Xizang	Collected	Sichuan Experimental Base of the Elymus Research Institute, Sichuan Agricultural University	96.012	29.0082	12795370	45.33	94.1	558549	21.5421
ES196	XZ	China, Xizang	Collected	Sichuan Experimental Base of the Elymus Research Institute, Sichuan Agricultural University	96.0123	29.0088	10189940	45.76	94.84	526530	18.2124
ES197	XZ	China, Xizang	Collected	Sichuan Experimental Base of the Elymus Research Institute, Sichuan Agricultural University	96.013	29.0093	10478411	45.79	93.29	554288	17.5809
ES198	XZ	China, Xizang	Collected	Sichuan Experimental Base of the Elymus Research Institute, Sichuan Agricultural University	96.013	29.0079	10628725	45.84	93.58	534273	18.6194
ES199	XZ	China, Xizang	Collected	Sichuan Experimental Base of the Elymus Research Institute, Sichuan Agricultural University	96.0124	29.0067	3269055	45.54	93.62	338849	9.0975
ES200	GS	China, Gansu Province	Collected	Sichuan Experimental Base of the Elymus Research Institute, Sichuan Agricultural University	102.072	35.0037	3196823	46.65	93.21	463407	6.1304
ES201	GS	China, Gansu Province	Collected	Sichuan Experimental Base of the Elymus Research Institute, Sichuan Agricultural University	102.011	35.0034	3432767	45.11	94.3	349418	9.0753
ES202	GS	China, Gansu Province	Collected	Sichuan Experimental Base of the Elymus Research Institute, Sichuan Agricultural University	102.021	35.0032	5097412	45.02	94.2	356626	13.4576
ES203	GS	China, Gansu Province	Collected	Sichuan Experimental Base of the Elymus Research Institute, Sichuan Agricultural University	102.023	35.0035	2178239	45.23	94.15	292543	7.0583
ES204	GS	China, Gansu Province	Collected	Sichuan Experimental Base of the Elymus Research Institute, Sichuan Agricultural University	102.085	35.0033	5420665	45.21	94.55	436918	11.6592
ES205	GS	China, Gansu Province	Collected	Sichuan Experimental Base of the Elymus Research Institute, Sichuan Agricultural University	102.073	35.0033	3376876	45.46	93.52	381554	8.3288
ES206	GS	China, Gansu Province	Collected	Sichuan Experimental Base of the Elymus Research Institute, Sichuan Agricultural University	102.012	34.0049	10059362	45.85	93.1	546543	17.4092
ES207	GS	China, Gansu Province	Collected	Sichuan Experimental Base of the Elymus Research Institute, Sichuan Agricultural University	102.013	34.0059	10670606	46.7	94.32	626456	15.9648
ES208	GS	China, Gansu Province	Collected	Sichuan Experimental Base of the Elymus Research Institute, Sichuan Agricultural University	102.012	34.0083	4175993	45.7	94.1	359354	10.9832
ES209	GS	China, Gansu Province	Collected	Sichuan Experimental Base of the Elymus Research Institute, Sichuan Agricultural University	102.011	34.0073	8034820	45.22	93.31	502921	15.0994
ES210	GS	China, Gansu Province	Collected	Sichuan Experimental Base of the Elymus Research Institute, Sichuan Agricultural University	102.013	34.006	4224250	44.42	94.69	365424	10.9458
ES211	GS	China, Gansu Province	Collected	Sichuan Experimental Base of the Elymus Research Institute, Sichuan Agricultural University	102.01	34.0059	5082904	43.37	94.18	341804	14.1195
ES212	GS	China, Gansu Province	Collected	Sichuan Experimental Base of the Elymus Research Institute, Sichuan Agricultural University	102.015	34.0143	3651991	45.5	93.73	246739	10.854
ES213	GS	China, Gansu Province	Collected	Sichuan Experimental Base of the Elymus Research Institute, Sichuan Agricultural University	102.015	34.0157	2827001	46.49	93.52	251314	7.9453
ES214	GS	China, Gansu Province	Collected	Sichuan Experimental Base of the Elymus Research Institute, Sichuan Agricultural University	102.015	34.0157	2446512	46.77	93.15	231070	7.6739
ES215	GS	China, Gansu Province	Collected	Sichuan Experimental Base of the Elymus Research Institute, Sichuan Agricultural University	102.015	34.0206	12727002	45.98	94.02	442111	20.9387
ES216	GS	China, Gansu Province	Collected	Sichuan Experimental Base of the Elymus Research Institute, Sichuan Agricultural University	102.015	34.0177	2865322	46.53	94.17	219330	9.5553
ES217	GS	China, Gansu Province	Collected	Sichuan Experimental Base of the Elymus Research Institute, Sichuan Agricultural University	102.015	34.0136	6919023	44.35	94.66	257204	19.8645
ES218	SC	China, Sichuan Province	Collected	Sichuan Experimental Base of the Elymus Research Institute, Sichuan Agricultural University	102.62	31.88	7171980	45.99	94.33	544213	12.2494
ES219	SC	China, Sichuan Province	Collected	Sichuan Experimental Base of the Elymus Research Institute, Sichuan Agricultural University	102.611	31.8779	5258365	46	93.37	476900	10.2247
ES220	SC	China, Sichuan Province	Collected	Sichuan Experimental Base of the Elymus Research Institute, Sichuan Agricultural University	102.621	31.8796	2302228	45.21	93.56	319359	6.7856
ES221	SC	China, Sichuan Province	Collected	Sichuan Experimental Base of the Elymus Research Institute, Sichuan Agricultural University	102.619	31.8399	2619599	44.77	93.44	287067	8.5985
ES222	SC	China, Sichuan Province	Collected	Sichuan Experimental Base of the Elymus Research Institute, Sichuan Agricultural University	102.621	31.8825	2278307	45.42	93.78	305148	7.0138
ES223	SC	China, Sichuan Province	Collected	Sichuan Experimental Base of the Elymus Research Institute, Sichuan Agricultural University	102.622	31.8808	8717097	45.17	93.04	477923	17.1618
ES224	SC	China, Sichuan Province	Collected	Sichuan Experimental Base of the Elymus Research Institute, Sichuan Agricultural University	103.229	33.583	2225236	45.27	94.79	287458	7.3368
ES225	SC	China, Sichuan Province	Collected	Sichuan Experimental Base of the Elymus Research Institute, Sichuan Agricultural University	103.22	33.583	2098335	45.16	93.93	300193	6.6
ES226	SC	China, Sichuan Province	Collected	Sichuan Experimental Base of the Elymus Research Institute, Sichuan Agricultural University	103.229	33.5833	1522696	45.21	94.37	258908	5.5335
ES227	SC	China, Sichuan Province	Collected	Sichuan Experimental Base of the Elymus Research Institute, Sichuan Agricultural University	103.233	33.583	2832885	45.45	94.35	317980	8.4398
ES228	SC	China, Sichuan Province	Collected	Sichuan Experimental Base of the Elymus Research Institute, Sichuan Agricultural University	103.229	33.5834	3341361	45.04	95.05	355604	8.8663
ES229	SC	China, Sichuan Province	Collected	Sichuan Experimental Base of the Elymus Research Institute, Sichuan Agricultural University	103.229	33.5826	2934102	45.47	94.34	323676	8.5634
ES230	SC	China, Sichuan Province	Collected	Sichuan Experimental Base of the Elymus Research Institute, Sichuan Agricultural University	102.056	32.7623	2300727	45.38	94.01	313954	6.9048
ES231	SC	China, Sichuan Province	Collected	Sichuan Experimental Base of the Elymus Research Institute, Sichuan Agricultural University	102.055	32.7629	1975249	44.64	94.19	267218	7.0136
ES232	SC	China, Sichuan Province	Collected	Sichuan Experimental Base of the Elymus Research Institute, Sichuan Agricultural University	102.056	32.7634	3895934	45.18	93.89	355564	10.3634
ES233	SC	China, Sichuan Province	Collected	Sichuan Experimental Base of the Elymus Research Institute, Sichuan Agricultural University	102.056	32.7602	2320094	45.34	94	318372	6.8051
ES234	SC	China, Sichuan Province	Collected	Sichuan Experimental Base of the Elymus Research Institute, Sichuan Agricultural University	102.055	32.7598	3339508	45.29	94	324624	9.7481
ES235	SC	China, Sichuan Province	Collected	Sichuan Experimental Base of the Elymus Research Institute, Sichuan Agricultural University	102.055	32.7578	3184209	47.51	94.28	389177	7.5312
ES236	QH	China, Qinghai Province	Collected	Sichuan Experimental Base of the Elymus Research Institute, Sichuan Agricultural University	101.016	36.0073	3004540	45.89	94.5	413190	6.65
ES237	QH	China, Qinghai Province	Collected	Sichuan Experimental Base of the Elymus Research Institute, Sichuan Agricultural University	101.016	36.007	2899980	44.99	94.27	358762	7.5605
ES238	QH	China, Qinghai Province	Collected	Sichuan Experimental Base of the Elymus Research Institute, Sichuan Agricultural University	101.016	36.007	3130196	45.02	93.46	414177	6.8774
ES239	QH	China, Qinghai Province	Collected	Sichuan Experimental Base of the Elymus Research Institute, Sichuan Agricultural University	101.016	36.007	3032226	44.78	94.83	313574	9.1618
ES240	QH	China, Qinghai Province	Collected	Sichuan Experimental Base of the Elymus Research Institute, Sichuan Agricultural University	101.016	36.0073	2313400	44.28	93.3	298473	7.3156
ES241	QH	China, Qinghai Province	Collected	Sichuan Experimental Base of the Elymus Research Institute, Sichuan Agricultural University	101.016	36.0072	3269430	44.82	93.34	348045	8.8356
ES242	QH	China, Qinghai Province	Collected	Sichuan Experimental Base of the Elymus Research Institute, Sichuan Agricultural University	97.0031	33.0103	2446363	44.94	92.98	305352	7.5883
ES243	QH	China, Qinghai Province	Collected	Sichuan Experimental Base of the Elymus Research Institute, Sichuan Agricultural University	97.003	33.0103	3398412	44.33	94.29	341382	9.4269
ES244	QH	China, Qinghai Province	Collected	Sichuan Experimental Base of the Elymus Research Institute, Sichuan Agricultural University	97.003	33.0103	2245858	45.46	93.65	203366	8.1175
ES245	QH	China, Qinghai Province	Collected	Sichuan Experimental Base of the Elymus Research Institute, Sichuan Agricultural University	97.0031	33.0103	9140215	45.23	92.91	350248	19.1187
ES246	QH	China, Qinghai Province	Collected	Sichuan Experimental Base of the Elymus Research Institute, Sichuan Agricultural University	97.0031	33.0103	10376344	45.99	92.48	382179	19.7033
ES247	QH	China, Qinghai Province	Collected	Sichuan Experimental Base of the Elymus Research Institute, Sichuan Agricultural University	97.003	33.0103	7584608	44.32	93.41	431644	16.6548
ES248	QH	China, Qinghai Province	Collected	Sichuan Experimental Base of the Elymus Research Institute, Sichuan Agricultural University	97.0061	37.0044	10839849	46.12	94.86	439374	17.7473
ES249	QH	China, Qinghai Province	Collected	Sichuan Experimental Base of the Elymus Research Institute, Sichuan Agricultural University	97.0061	37.0044	10388193	46.23	94.44	442559	16.811
ES250	QH	China, Qinghai Province	Collected	Sichuan Experimental Base of the Elymus Research Institute, Sichuan Agricultural University	97.0061	37.0044	10058051	45.64	93.64	398511	18.2151
ES251	QH	China, Qinghai Province	Collected	Sichuan Experimental Base of the Elymus Research Institute, Sichuan Agricultural University	97.0061	37.0043	11551689	45.26	94.16	437625	19.0262
ES252	QH	China, Qinghai Province	Collected	Sichuan Experimental Base of the Elymus Research Institute, Sichuan Agricultural University	97.0061	37.0041	9417201	46.15	93.99	356576	19.1526
ES253	QH	China, Qinghai Province	Collected	Sichuan Experimental Base of the Elymus Research Institute, Sichuan Agricultural University	97.0061	37.0044	7064124	46.15	94.24	393584	12.561
ES254	XJ	China, Xinjiang	Collected	Sichuan Experimental Base of the Elymus Research Institute, Sichuan Agricultural University	81.0011	43.0067	9798852	45.74	94.34	506491	18.4641
ES255	XJ	China, Xinjiang	Collected	Sichuan Experimental Base of the Elymus Research Institute, Sichuan Agricultural University	81.0019	43.007	10620634	45.43	94.56	554258	18.3369
ES256	XJ	China, Xinjiang	Collected	Sichuan Experimental Base of the Elymus Research Institute, Sichuan Agricultural University	81.0018	43.0064	10613027	46.54	93.89	525356	19.1501
ES257	XJ	China, Xinjiang	Collected	Sichuan Experimental Base of the Elymus Research Institute, Sichuan Agricultural University	81.0015	43.0066	9664219	45.99	93.85	538308	17.1048
ES258	XJ	China, Xinjiang	Collected	Sichuan Experimental Base of the Elymus Research Institute, Sichuan Agricultural University	81.001	43.006	6221208	45.71	94.43	482324	12.2073
ES259	XJ	China, Xinjiang	Collected	Sichuan Experimental Base of the Elymus Research Institute, Sichuan Agricultural University	81.0026	43.0062	9564507	45.41	94.62	507091	18.1289
ES260	XJ	China, Xinjiang	Collected	Sichuan Experimental Base of the Elymus Research Institute, Sichuan Agricultural University	89.0128	47.0028	8016243	45.32	94.11	457717	16.3241
ES261	XJ	China, Xinjiang	Collected	Sichuan Experimental Base of the Elymus Research Institute, Sichuan Agricultural University	89.0122	47.0027	7299194	46.97	93.96	464800	14.93
ES262	XJ	China, Xinjiang	Collected	Sichuan Experimental Base of the Elymus Research Institute, Sichuan Agricultural University	89.0128	47.0026	7674304	44.98	93.98	483974	15.0683
ES263	XJ	China, Xinjiang	Collected	Sichuan Experimental Base of the Elymus Research Institute, Sichuan Agricultural University	89.0126	47.003	8679825	45.84	94.47	471731	17.5005
ES264	XJ	China, Xinjiang	Collected	Sichuan Experimental Base of the Elymus Research Institute, Sichuan Agricultural University	89.0126	47.003	9078403	45.12	94.24	463805	18.7349
ES265	XJ	China, Xinjiang	Collected	Sichuan Experimental Base of the Elymus Research Institute, Sichuan Agricultural University	89.0124	47.0027	2560810	45.41	94.43	350482	6.7969
ES266	XJ	China, Xinjiang	Collected	Sichuan Experimental Base of the Elymus Research Institute, Sichuan Agricultural University	90.0047	46.0089	3076249	46.01	94.14	372668	7.6427
ES267	XJ	China, Xinjiang	Collected	Sichuan Experimental Base of the Elymus Research Institute, Sichuan Agricultural University	90.0047	46.008	4487547	45.32	95.37	352914	12.1187
ES268	XJ	China, Xinjiang	Collected	Sichuan Experimental Base of the Elymus Research Institute, Sichuan Agricultural University	90.005	46.0082	4178804	47.23	94.4	377328	10.5079
ES269	XJ	China, Xinjiang	Collected	Sichuan Experimental Base of the Elymus Research Institute, Sichuan Agricultural University	90.0042	46.008	3844159	46.72	93.96	388947	9.2431
ES270	XJ	China, Xinjiang	Collected	Sichuan Experimental Base of the Elymus Research Institute, Sichuan Agricultural University	90.0043	46.0083	4655059	46.75	94.55	417145	10.4941
ES271	XJ	China, Xinjiang	Collected	Sichuan Experimental Base of the Elymus Research Institute, Sichuan Agricultural University	89.0101	43.0126	3579972	46.29	94.54	384984	8.7301
ES272	XJ	China, Xinjiang	Collected	Sichuan Experimental Base of the Elymus Research Institute, Sichuan Agricultural University	89.0101	43.0136	2610120	48.5	93.49	367978	6.2655
ES273	XJ	China, Xinjiang	Collected	Sichuan Experimental Base of the Elymus Research Institute, Sichuan Agricultural University	89.0108	43.012	4884232	47.47	94.62	420986	10.8243
ES274	XJ	China, Xinjiang	Collected	Sichuan Experimental Base of the Elymus Research Institute, Sichuan Agricultural University	89.0106	43.0114	2688481	47.09	93.19	363817	6.8891
ES275	XJ	China, Xinjiang	Collected	Sichuan Experimental Base of the Elymus Research Institute, Sichuan Agricultural University	89.0114	43.0134	3635644	47.78	94.68	374564	9.1977
ES276	XJ	China, Xinjiang	Collected	Sichuan Experimental Base of the Elymus Research Institute, Sichuan Agricultural University	89.0102	43.0157	3274852	47.31	95.03	348311	8.8926
ES277	XJ	China, Xinjiang	Collected	Sichuan Experimental Base of the Elymus Research Institute, Sichuan Agricultural University	87.0047	43.0094	3662385	46.97	94.7	432155	7.8347
ES278	XJ	China, Xinjiang	Collected	Sichuan Experimental Base of the Elymus Research Institute, Sichuan Agricultural University	87.0043	43.0095	3080263	45.97	94.76	356073	8.217
ES279	XJ	China, Xinjiang	Collected	Sichuan Experimental Base of the Elymus Research Institute, Sichuan Agricultural University	87.0047	43.0092	4041080	47.26	94.01	384330	9.9451
ES280	XJ	China, Xinjiang	Collected	Sichuan Experimental Base of the Elymus Research Institute, Sichuan Agricultural University	87.0043	43.0093	2662962	46.4	94.42	331456	7.6056
ES281	XJ	China, Xinjiang	Collected	Sichuan Experimental Base of the Elymus Research Institute, Sichuan Agricultural University	87.0048	43.0091	3411925	47.73	94.25	376114	8.5364
ES282	XJ	China, Xinjiang	Collected	Sichuan Experimental Base of the Elymus Research Institute, Sichuan Agricultural University	87.0049	43.0095	3292239	48.44	95.12	375397	8.2067
ES283	NC2	Mongolia	Obtained form the National Plant Germplasm System (NGPS)	Sichuan Experimental Base of the Elymus Research Institute, Sichuan Agricultural University	119.015	47.0019	2308658	48.38	94.51	63100	7.3979
ES284	NC2	Mongolia	Obtained form the National Plant Germplasm System (NGPS)	Sichuan Experimental Base of the Elymus Research Institute, Sichuan Agricultural University	119.015	47.002	7077179	46.57	94.34	458315	14.5899
ES285	NC2	Mongolia	Obtained form the National Plant Germplasm System (NGPS)	Sichuan Experimental Base of the Elymus Research Institute, Sichuan Agricultural University	119.015	47.0019	3094684	48.54	93.1	397880	7.118
ES286	NC2	Mongolia	Obtained form the National Plant Germplasm System (NGPS)	Sichuan Experimental Base of the Elymus Research Institute, Sichuan Agricultural University	119.015	47.0018	1797452	50.31	92.03	309079	5.0346
ES287	NC2	Mongolia	Obtained form the National Plant Germplasm System (NGPS)	Sichuan Experimental Base of the Elymus Research Institute, Sichuan Agricultural University	119.015	47.0021	8485785	47.32	93.34	512457	15.5169
ES288	NC2	Mongolia	Obtained form the National Plant Germplasm System (NGPS)	Sichuan Experimental Base of the Elymus Research Institute, Sichuan Agricultural University	119.015	47.0019	3874851	49.68	93.47	394931	9.1581
ES289	NC1	China, Inner Mongolia	Collected	Sichuan Experimental Base of the Elymus Research Institute, Sichuan Agricultural University	118.009	43.0164	6137355	47.28	93.58	434007	13.374
ES290	NC1	China, Inner Mongolia	Collected	Sichuan Experimental Base of the Elymus Research Institute, Sichuan Agricultural University	118.009	43.0161	3446370	47.66	92.93	396440	7.9156
ES291	NC1	China, Inner Mongolia	Collected	Sichuan Experimental Base of the Elymus Research Institute, Sichuan Agricultural University	118.009	43.0162	3620402	48.13	93.22	423574	7.6284
ES292	NC1	China, Inner Mongolia	Collected	Sichuan Experimental Base of the Elymus Research Institute, Sichuan Agricultural University	118.009	43.0165	5240577	47.35	93.03	400097	12.262
ES293	NC1	China, Inner Mongolia	Collected	Sichuan Experimental Base of the Elymus Research Institute, Sichuan Agricultural University	118.009	43.0162	6228418	43.94	94.19	384885	15.3833
ES294	NC1	China, Inner Mongolia	Collected	Sichuan Experimental Base of the Elymus Research Institute, Sichuan Agricultural University	118.009	43.016	6110139	44.99	93.92	410368	14.0704
ES295	NC1	China, Inner Mongolia	Collected	Sichuan Experimental Base of the Elymus Research Institute, Sichuan Agricultural University	116.004	42.0085	5487248	44.68	94.15	385224	13.4891
ES296	NC1	China, Inner Mongolia	Collected	Sichuan Experimental Base of the Elymus Research Institute, Sichuan Agricultural University	116.004	42.0086	4871568	47.54	92.4	362941	9.0399
ES297	NC1	China, Inner Mongolia	Collected	Sichuan Experimental Base of the Elymus Research Institute, Sichuan Agricultural University	116.004	42.0086	4295158	47.58	92.89	320727	9.0942
ES298	NC1	China, Inner Mongolia	Collected	Sichuan Experimental Base of the Elymus Research Institute, Sichuan Agricultural University	116.004	42.0086	5019654	47.77	94.16	285212	12.5291
ES299	NC1	China, Inner Mongolia	Collected	Sichuan Experimental Base of the Elymus Research Institute, Sichuan Agricultural University	116.004	42.0086	4228109	47.82	93.34	383831	10.271
ES300	NC1	China, Inner Mongolia	Collected	Sichuan Experimental Base of the Elymus Research Institute, Sichuan Agricultural University	116.004	42.0086	6006651	46.96	94.13	439815	12.8571
ES301	NC1	China, Hebei Province	Collected	Sichuan Experimental Base of the Elymus Research Institute, Sichuan Agricultural University	115.001	41.0092	5518699	43.81	94.12	317889	16.354
ES302	NC1	China, Hebei Province	Collected	Sichuan Experimental Base of the Elymus Research Institute, Sichuan Agricultural University	115	41.0089	7921936	45.78	94.21	445297	16.614
ES303	NC1	China, Hebei Province	Collected	Sichuan Experimental Base of the Elymus Research Institute, Sichuan Agricultural University	115.001	41.0093	7962080	43.32	94.25	377063	20.074
ES304	NC1	China, Hebei Province	Collected	Sichuan Experimental Base of the Elymus Research Institute, Sichuan Agricultural University	115.001	41.0079	6120533	43.55	93.97	351165	16.497
ES305	NC1	China, Hebei Province	Collected	Sichuan Experimental Base of the Elymus Research Institute, Sichuan Agricultural University	115	41.0082	5609933	44.32	94.23	359558	14.5934
ES306	NC1	China, Hebei Province	Collected	Sichuan Experimental Base of the Elymus Research Institute, Sichuan Agricultural University	115.001	41.0093	26079514	44.74	93.69	657128	36.8385
ES307	NC1	China, Hebei Province	Collected	Sichuan Experimental Base of the Elymus Research Institute, Sichuan Agricultural University	115.011	41.0083	5246377	44.74	94.17	399747	12.1274
ES308	NC1	China, Hebei Province	Collected	Sichuan Experimental Base of the Elymus Research Institute, Sichuan Agricultural University	115.012	41.008	3756997	44.78	94.08	348643	10.244
ES309	NC1	China, Hebei Province	Collected	Sichuan Experimental Base of the Elymus Research Institute, Sichuan Agricultural University	115.011	41.0082	4059895	45.79	95.35	362827	10.5958
ES310	NC1	China, Hebei Province	Collected	Sichuan Experimental Base of the Elymus Research Institute, Sichuan Agricultural University	115.01	41.0084	4559227	45.21	93.97	354219	12.2384
ES311	NC1	China, Hebei Province	Collected	Sichuan Experimental Base of the Elymus Research Institute, Sichuan Agricultural University	115.01	41.0079	3396605	46.05	93.9	364342	8.7802
ES312	NC1	China, Hebei Province	Collected	Sichuan Experimental Base of the Elymus Research Institute, Sichuan Agricultural University	115.011	41.0081	3395829	45.14	93.63	386832	8.1866
ES313	NC1	China, Hebei Province	Collected	Sichuan Experimental Base of the Elymus Research Institute, Sichuan Agricultural University	115.014	41.0059	3896435	45.5	94.84	366831	10.0308
ES314	NC1	China, Hebei Province	Collected	Sichuan Experimental Base of the Elymus Research Institute, Sichuan Agricultural University	115.015	41.006	3085150	45.75	94.29	330194	8.8543
ES315	NC1	China, Hebei Province	Collected	Sichuan Experimental Base of the Elymus Research Institute, Sichuan Agricultural University	115.015	41.0058	3180247	45.29	94.74	313619	9.663
ES316	NC1	China, Hebei Province	Collected	Sichuan Experimental Base of the Elymus Research Institute, Sichuan Agricultural University	115.015	41.0059	2783787	46.77	94.36	333442	7.8407
ES317	NC1	China, Hebei Province	Collected	Sichuan Experimental Base of the Elymus Research Institute, Sichuan Agricultural University	115.015	41.0058	3661986	46.31	94.52	365444	9.477
ES318	NC1	China, Hebei Province	Collected	Sichuan Experimental Base of the Elymus Research Institute, Sichuan Agricultural University	115.015	41.0059	3189645	45.03	94.57	222309	10.4011
